# Supplementary material
Source: PubMed Central journal article supplement (PMC3322229)
Supplement: mmc1.pdf [file mmc1.pdf]

**The American Journal of Human Genetics, Volume 90**

**Supplemental Data**

**Large-Scale Population Analysis Challenges**

**the Current Criteria for the Molecular Diagnosis**

**of Fascioscapulohumeral Muscular Dystrophy**

**Isabella Scionti, Francesca Greco, Giulia Ricci, Monica Govi, Patricia Arashiro, Liliana Vercelli, Angela Berardinelli, Corrado Angelini, Giovanni Antonini, Michelangelo Cao, Antonio Di Muzio, Maurizio Moggio, Lucia Morandi, Enzo Ricci, Carmelo Rodolico, Lucia Ruggiero, Lucio Santoro, Gabriele Siciliano, Giuliano Tomelleri, Carlo Pietro Trevisan, Giuliana Galluzzi, Woodring Wright, Mayana Zatz, and Rossella Tupler**

**Figure S1:** Strategy for D4Z4 genotyping and haplotyping of FSHD patients and healthy controls.

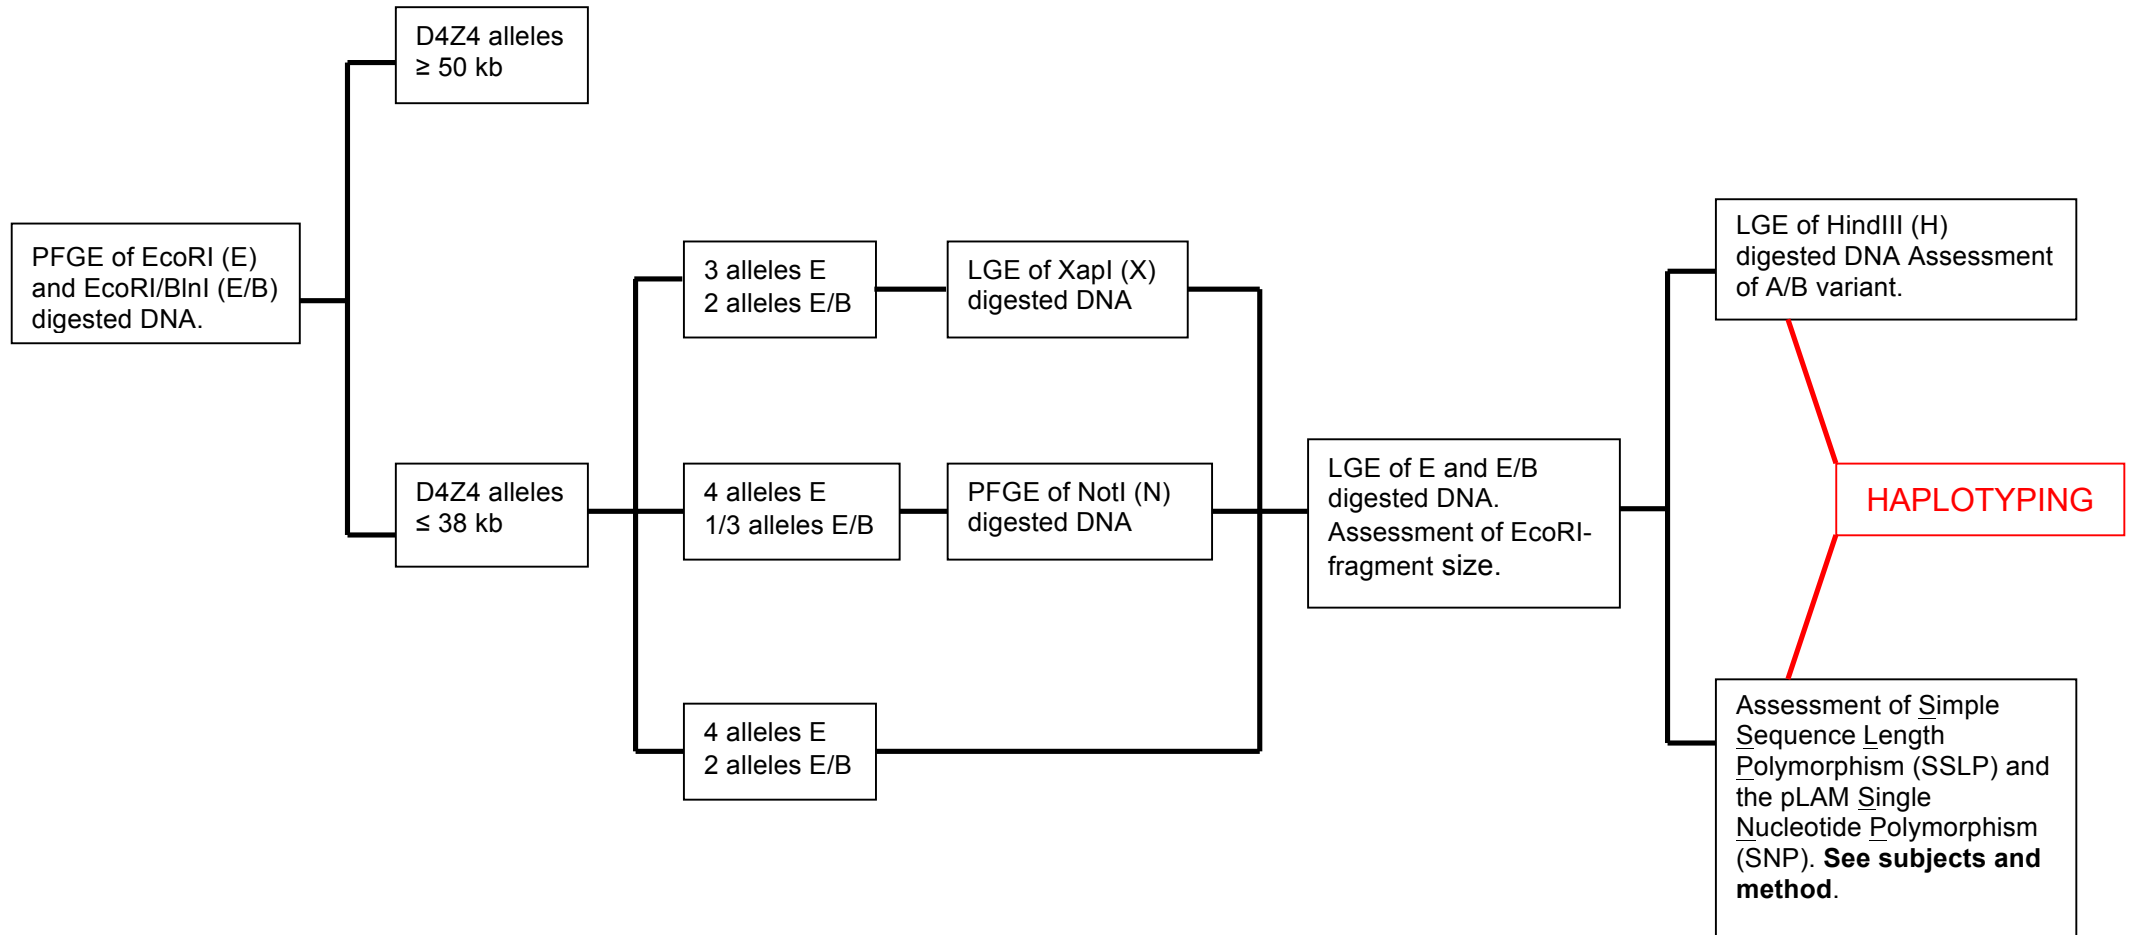

**Figure S2:** Example of genotype and haplotype.

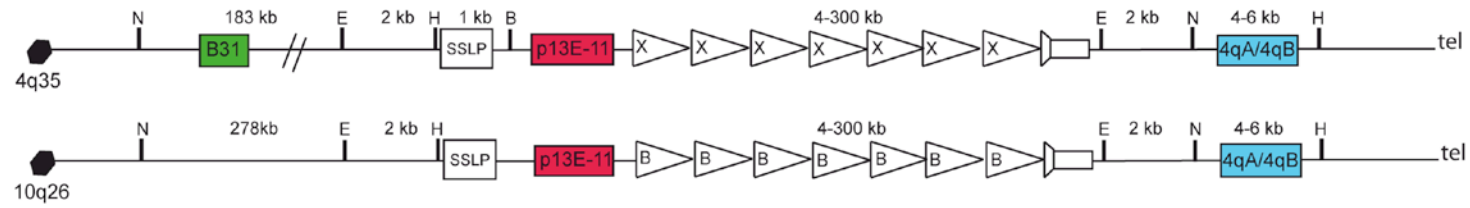

EcoRI fragment size + 185 kb = 4q35 NotI fragment size

EcoRI fragment size + 280 kb = 10q26 NotI fragment size

EcoRI fragment size + 6 kb = 4q35/10q26 HindIII fragment size

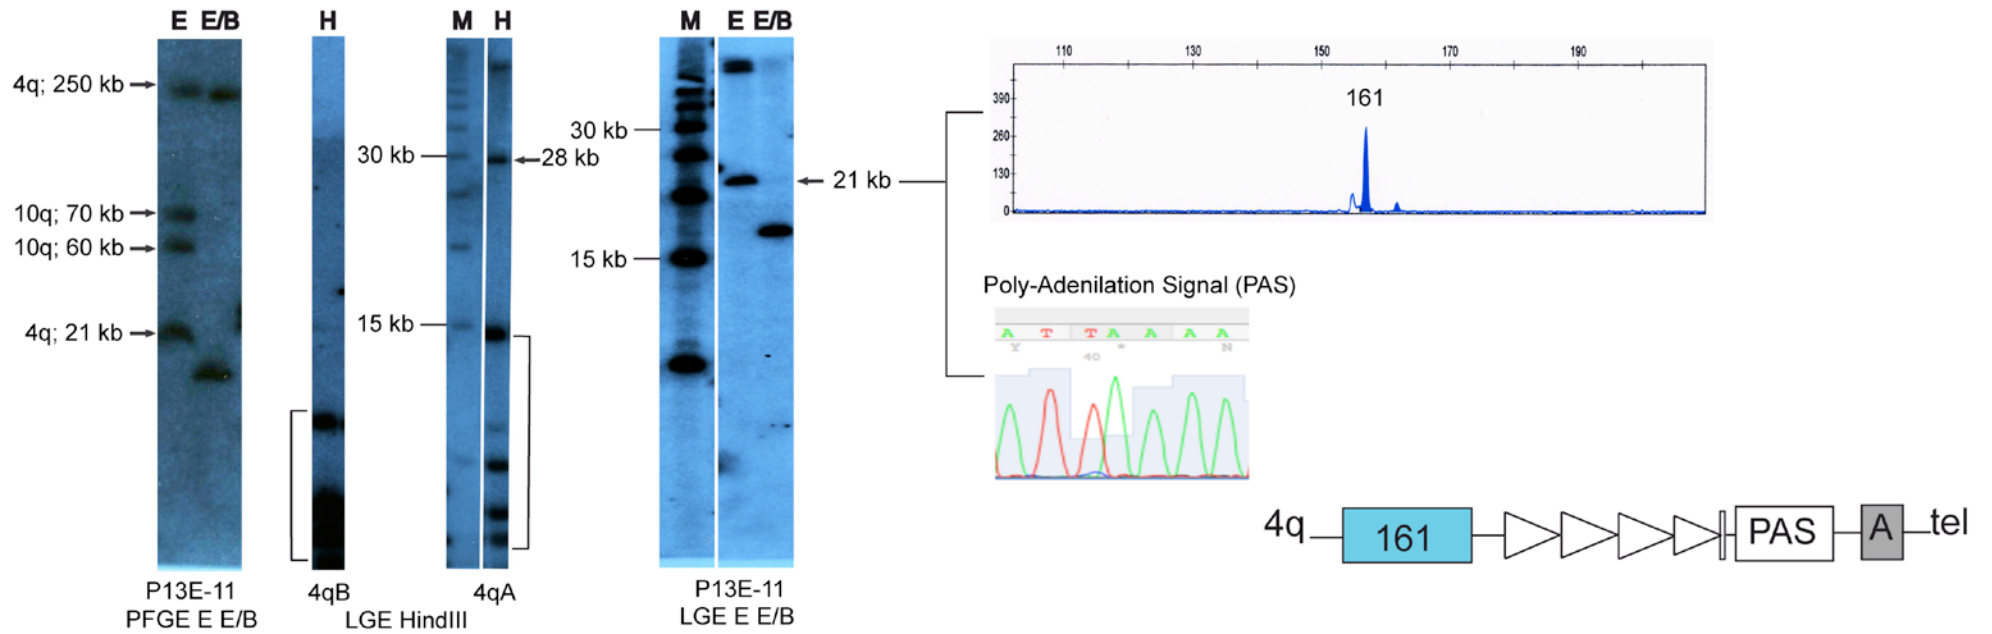

Healthy control with a D4Z4 allele of 21 Kb and 4A161PAS haplotype. Non-4q and 10q cross-hybridizing fragments with probes 4qA and 4qB are in brackets.

**Figure S3:** Examples of genotype and haplotype.

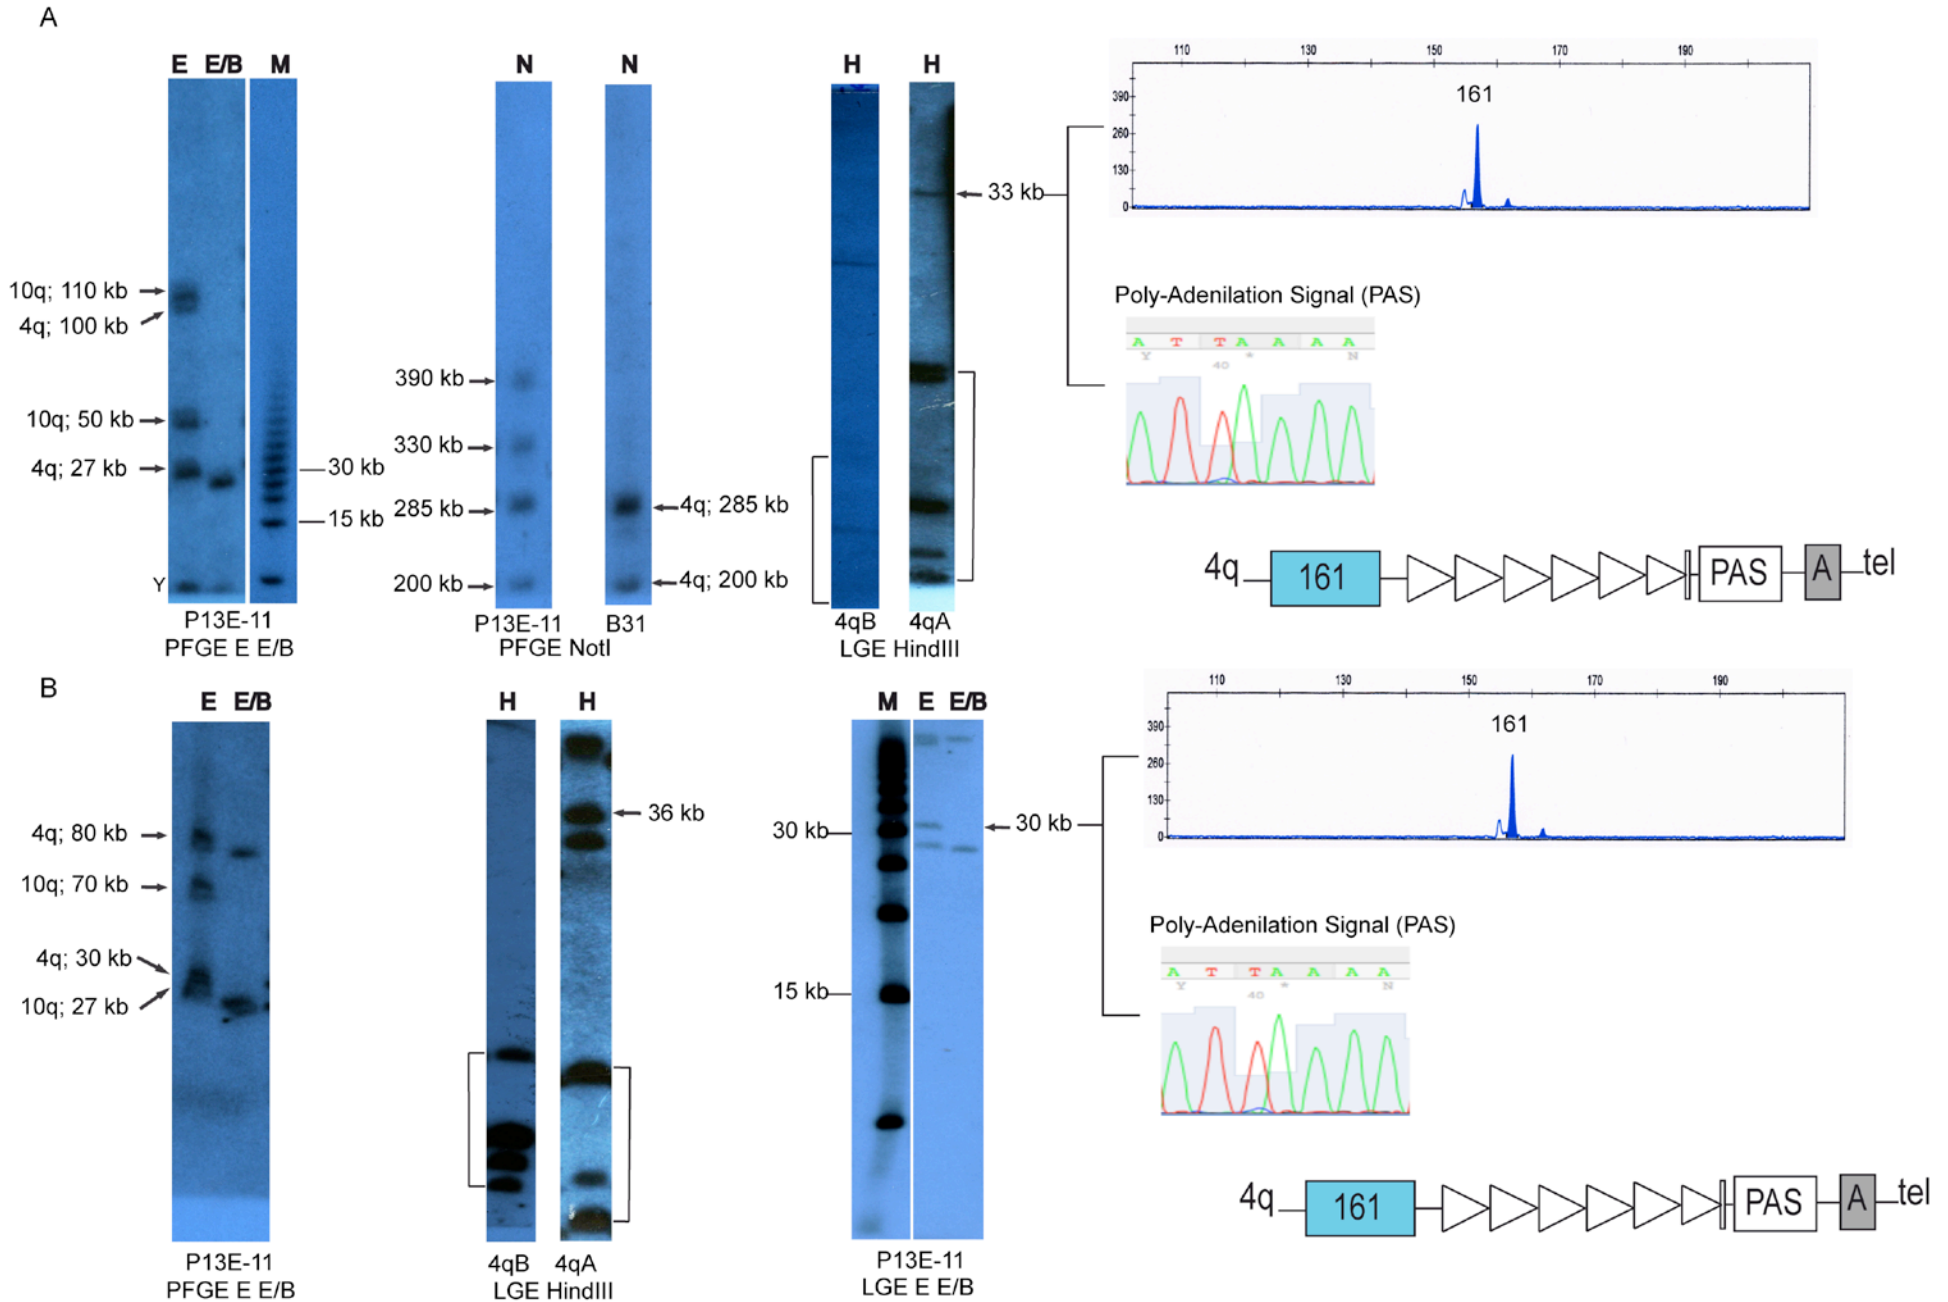

A) Healthy control with a D4Z4 allele of 27 kb and 4A161PAS haplotype; B) Healthy control with a D4Z4 allele of 30 kb and 4A161PAS haplotype. Non-4q and -10q cross-hybridization fragments with probes 4qA and 4qB are in brackets. Cross-hybridizing Y-chromosome-derived fragments with probe p13E-11 in male are indicated as “Y”.



**Figure S4:** Examples of genotype and haplotype.

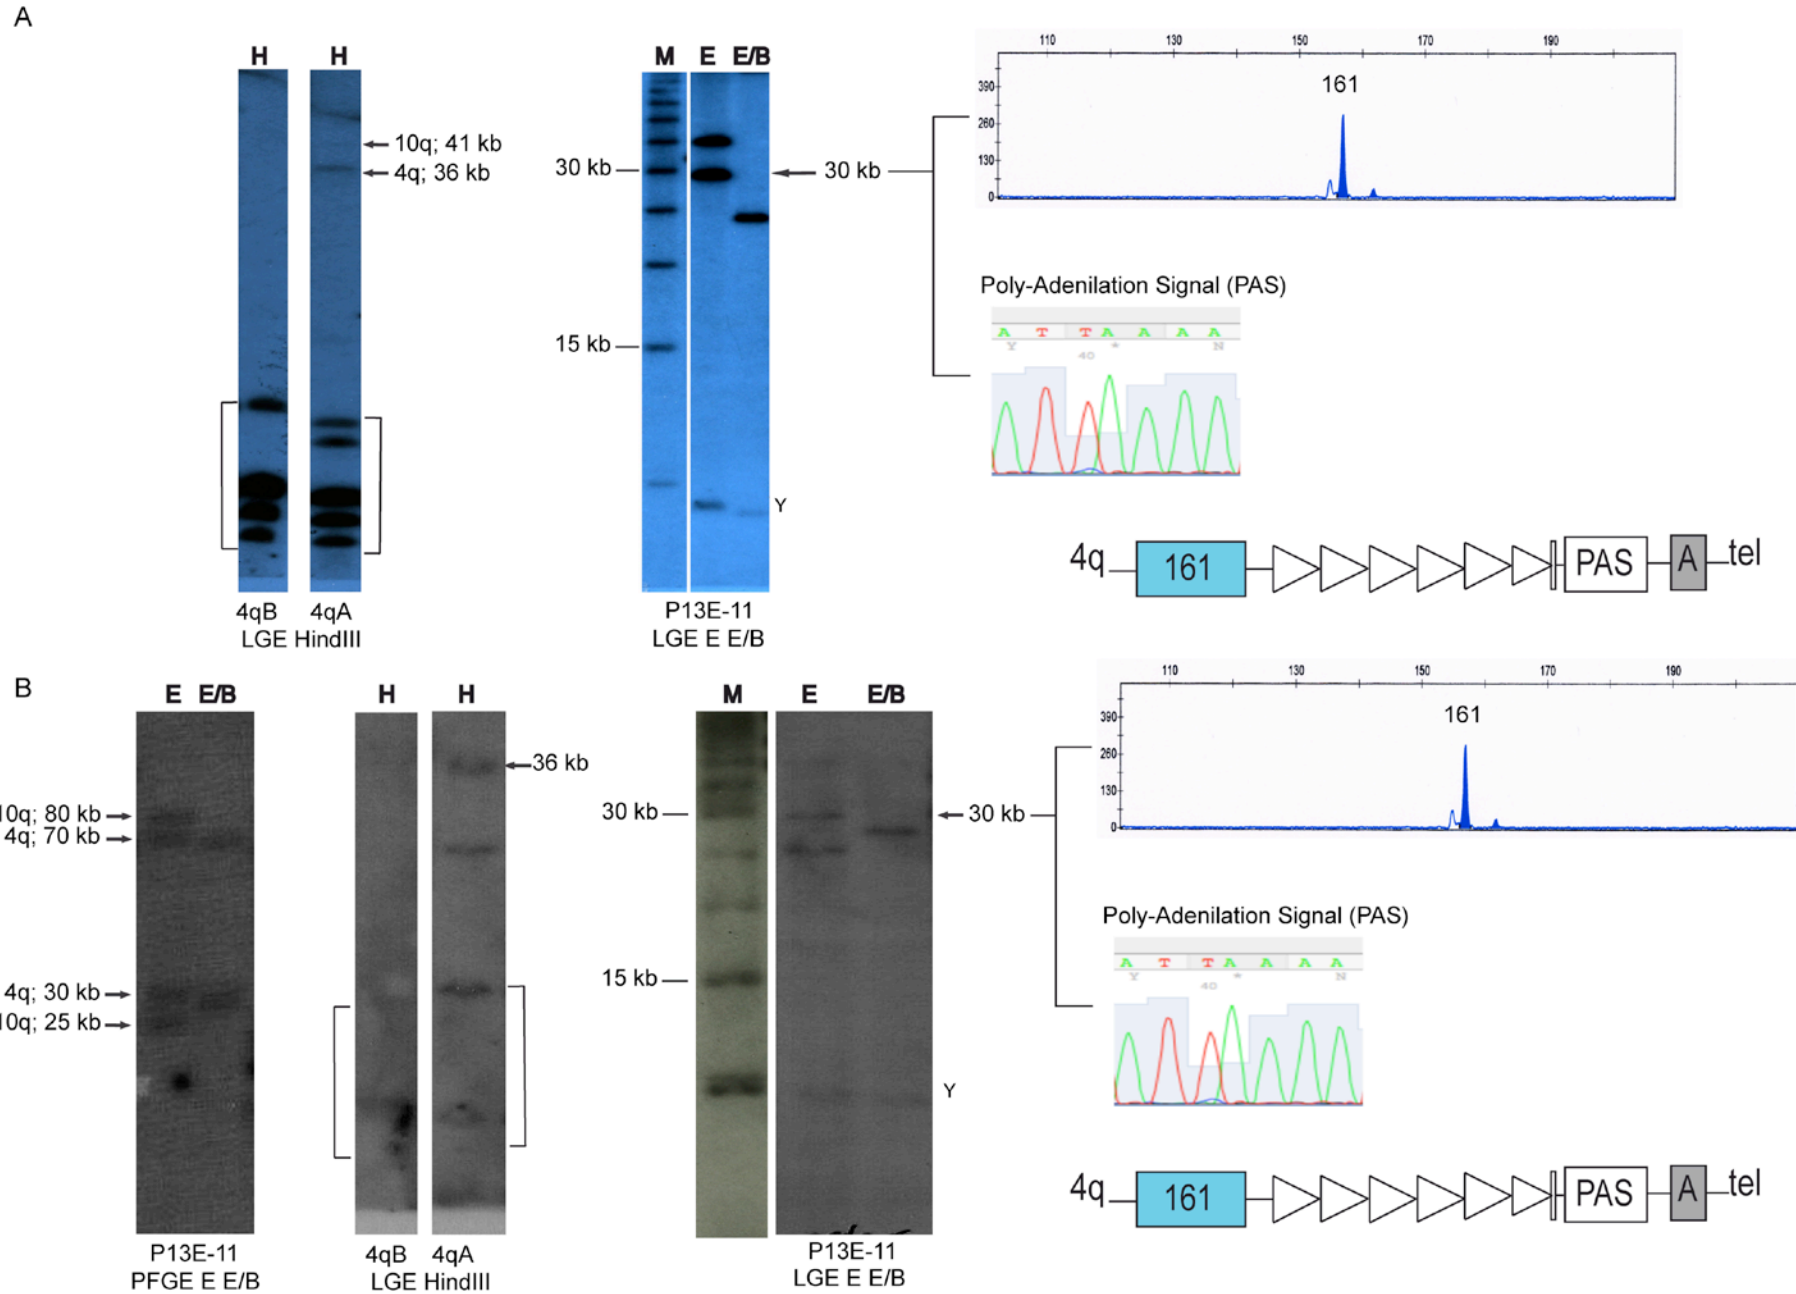

A) Healthy control with a D4Z4 allele of 27 kb and 4A161PAS haplotype; B) Healthy control with a D4Z4 allele of 30 kb and 4A161PAS haplotype. Non-4q and -10q cross-hybridization fragments with probes 4qA and 4qB are in brackets. Cross-hybridizing Y-chromosome-derived fragments with probe p13E-11 in male are indicated as “Y”.

**Figure S5:** Examples of genotype and haplotype.

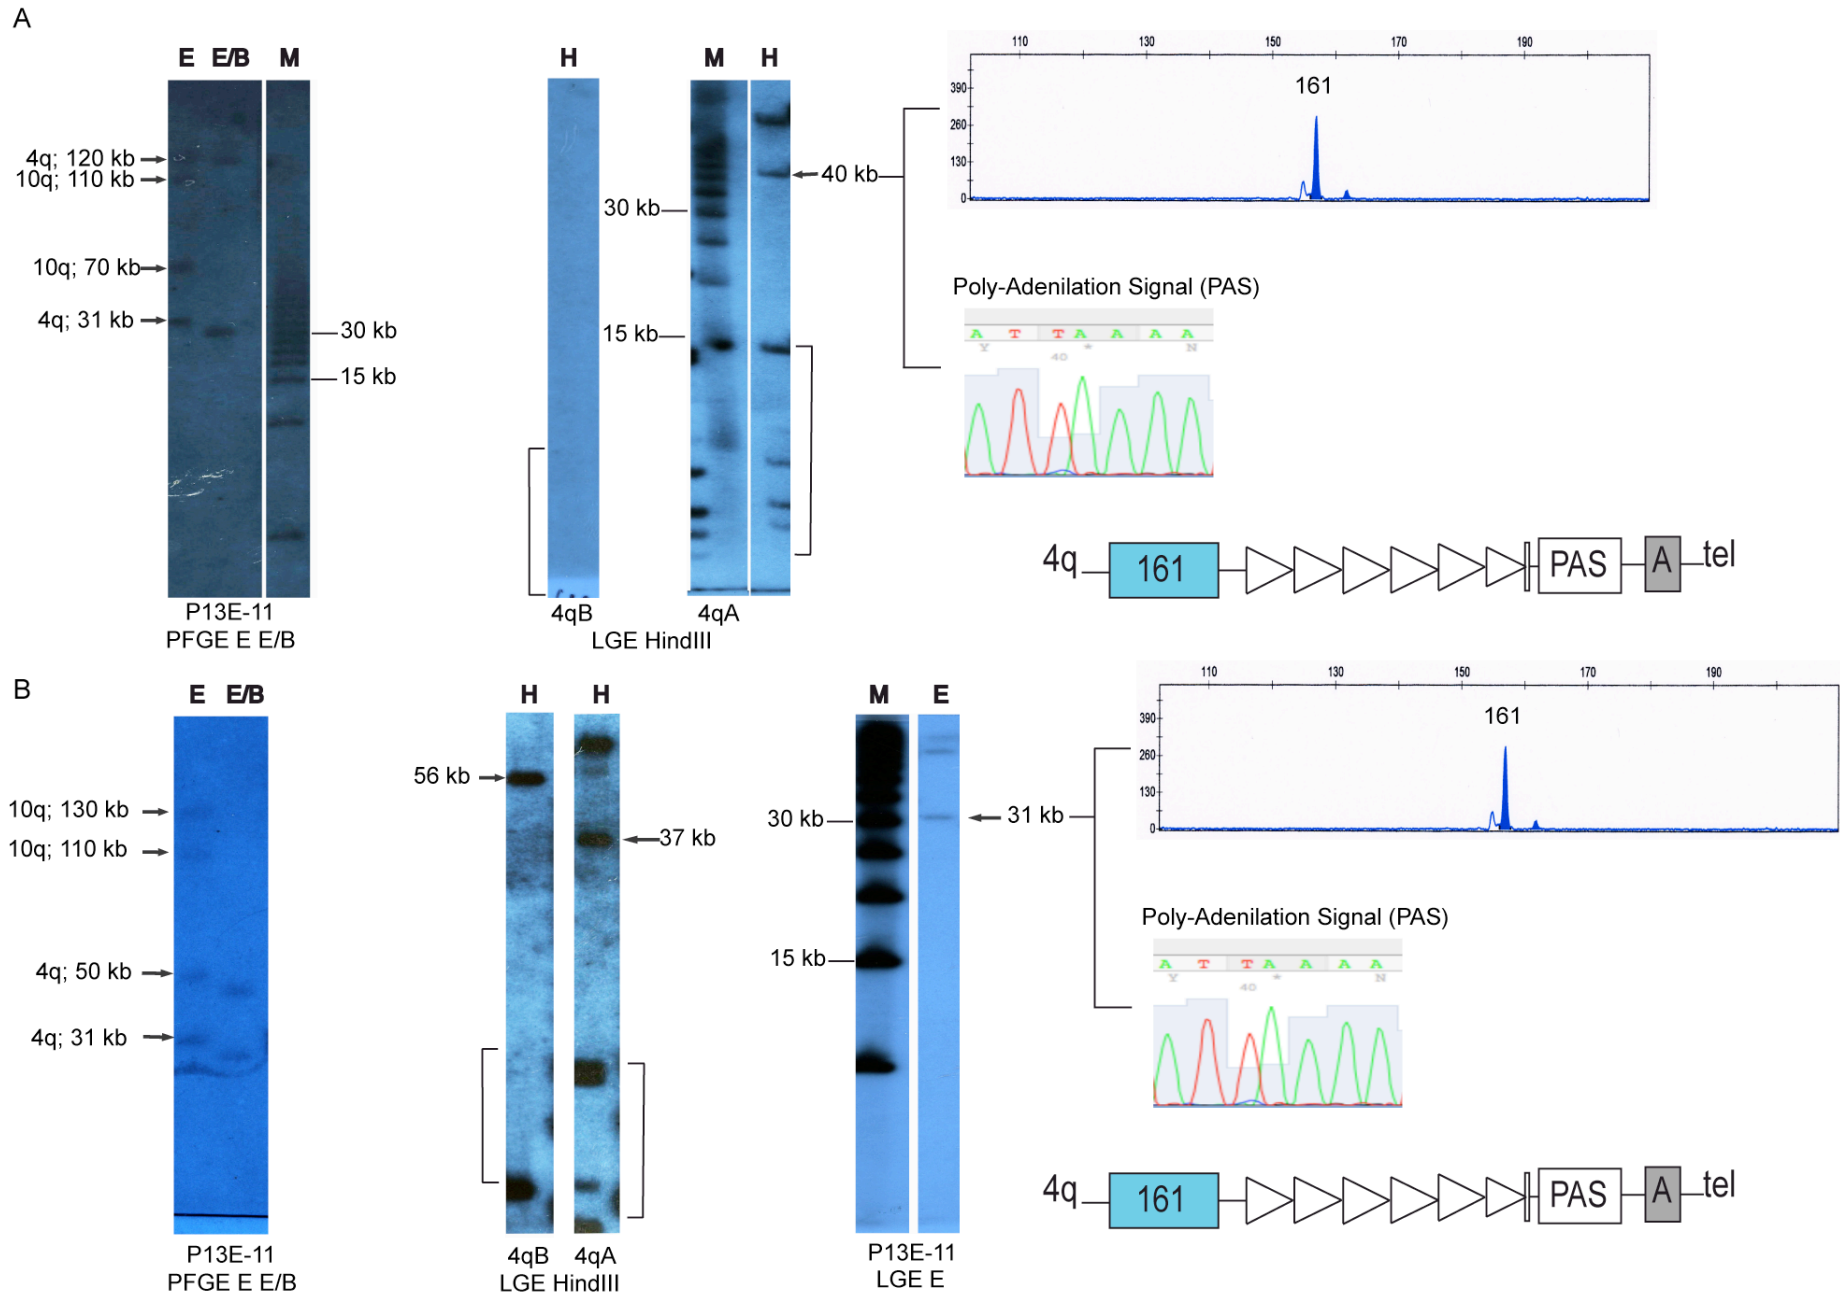

A) Healthy control with a D4Z4 allele of 33 kb and 4A161PAS haplotype; B) Healthy control with a D4Z4 allele of 31 kb and 4A161PAS haplotype. Non-4q and -10q cross-hybridization fragments with probes 4qA and 4qB are in brackets.

**Figure S6:** Examples of genotype and haplotype.

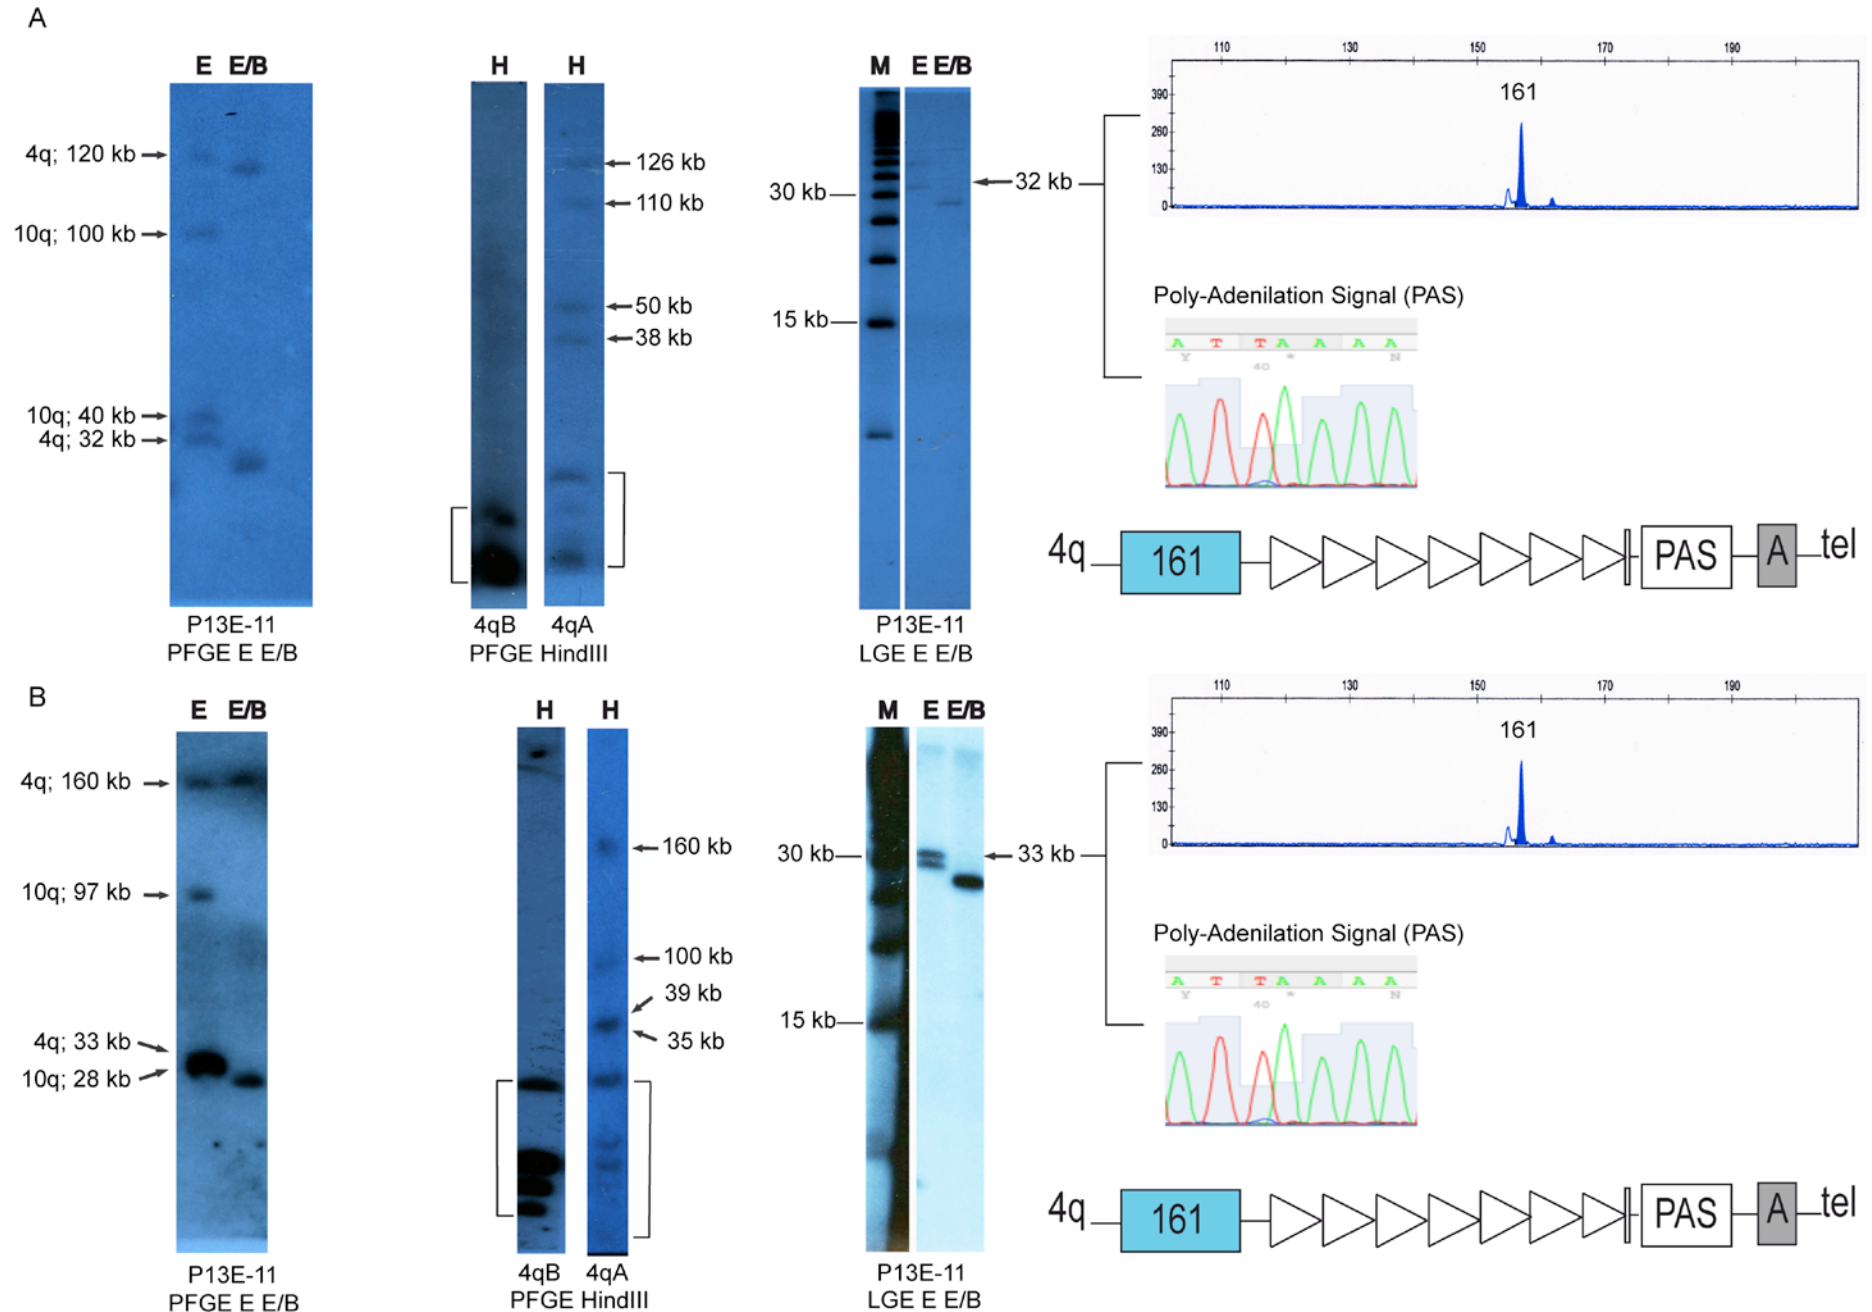

A) Healthy control with a D4Z4 allele of 32 kb and 4A161PAS haplotype; B) Healthy control with a D4Z4 allele of 33 kb and 4A161PAS haplotype. Non-4q and -10q cross-hybridization fragments with probes 4qA and 4qB are in brackets.

**Figure S7:** Examples of genotype and haplotype.

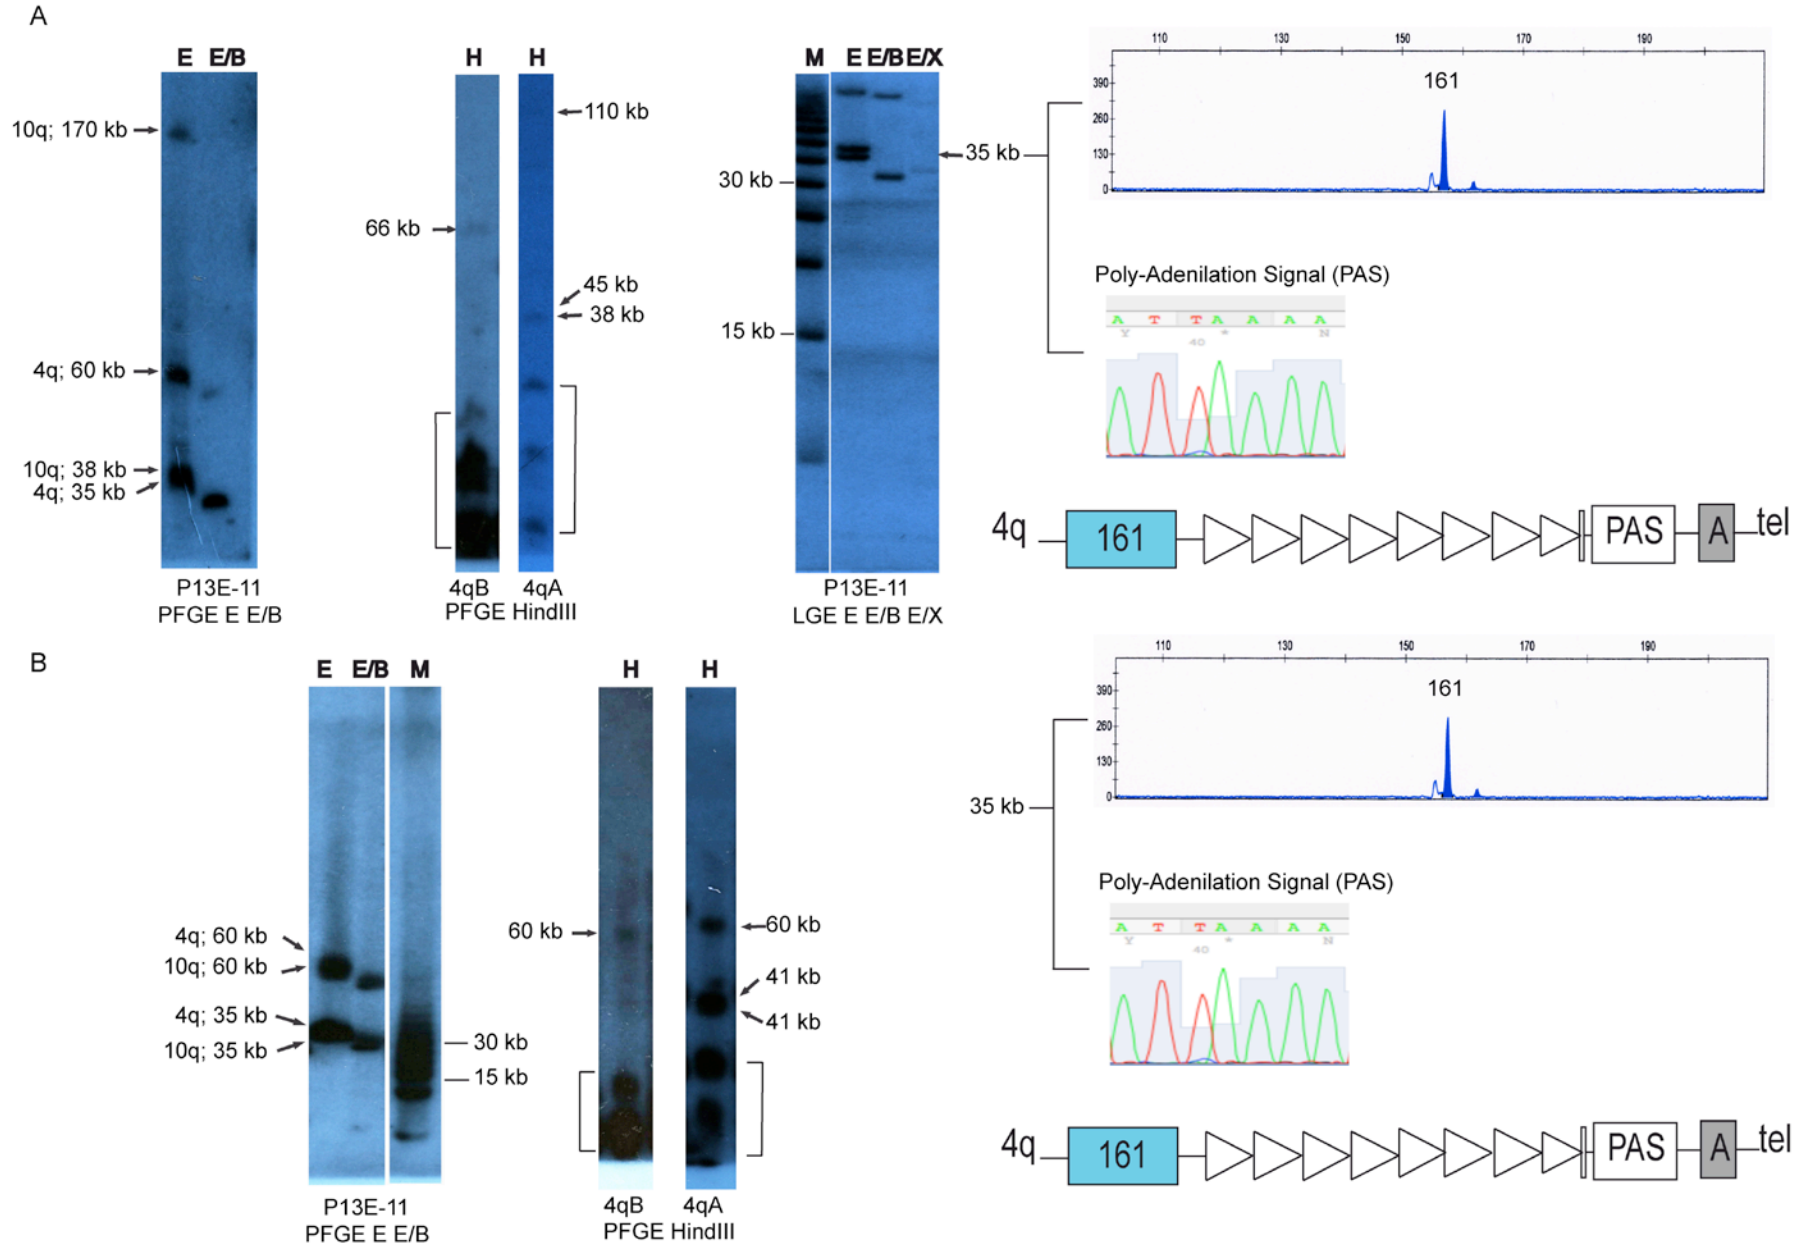

A) Healthy control with a D4Z4 allele of 35 kb and 4A161PAS haplotype; B) Healthy control with a D4Z4 allele of 35 kb and 4A161PAS haplotype. Non-4q and -10q cross-hybridization fragments with probes 4qA and 4qB are in brackets.



**Figure S8:** Example of genotype and haplotype.

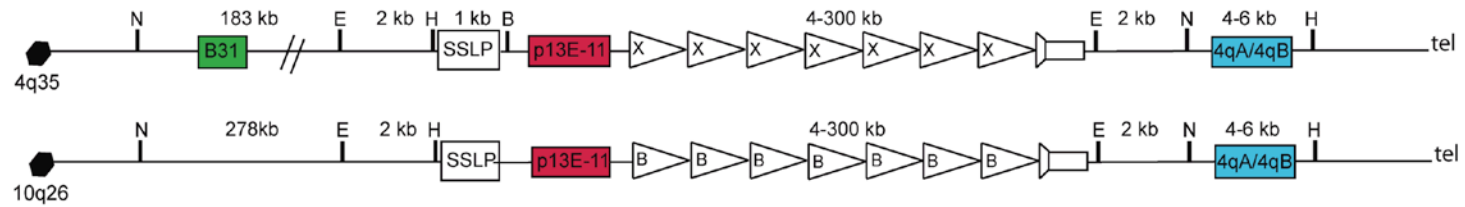

EcoRI fragment size + 185 kb = 4q35 NotI fragment size    EcoRI fragment size + 280 kb = 10q26 NotI fragment size    EcoRI fragment size + 6 kb = 4q35/10q26 HindIII fragment size

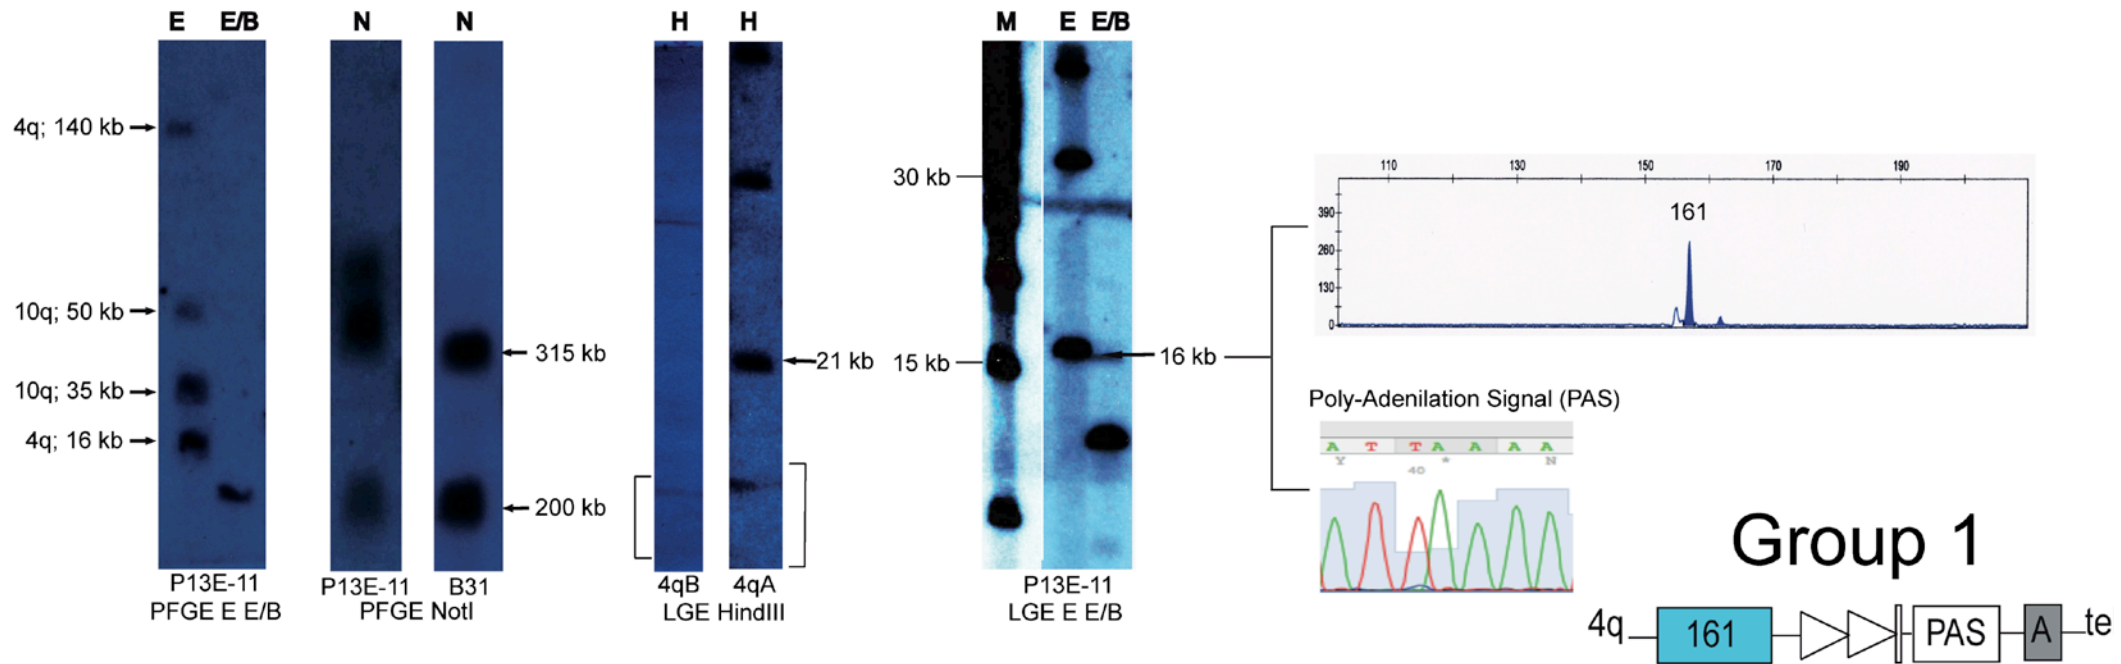

FSHD patient with a D4Z4 allele of 16 kb and 4A161PAS haplotype. Non-4q and -10q cross-hybridization fragments with probes 4qA and 4qB are in brackets.



**Figure S10:** Examples of genotype and haplotype.

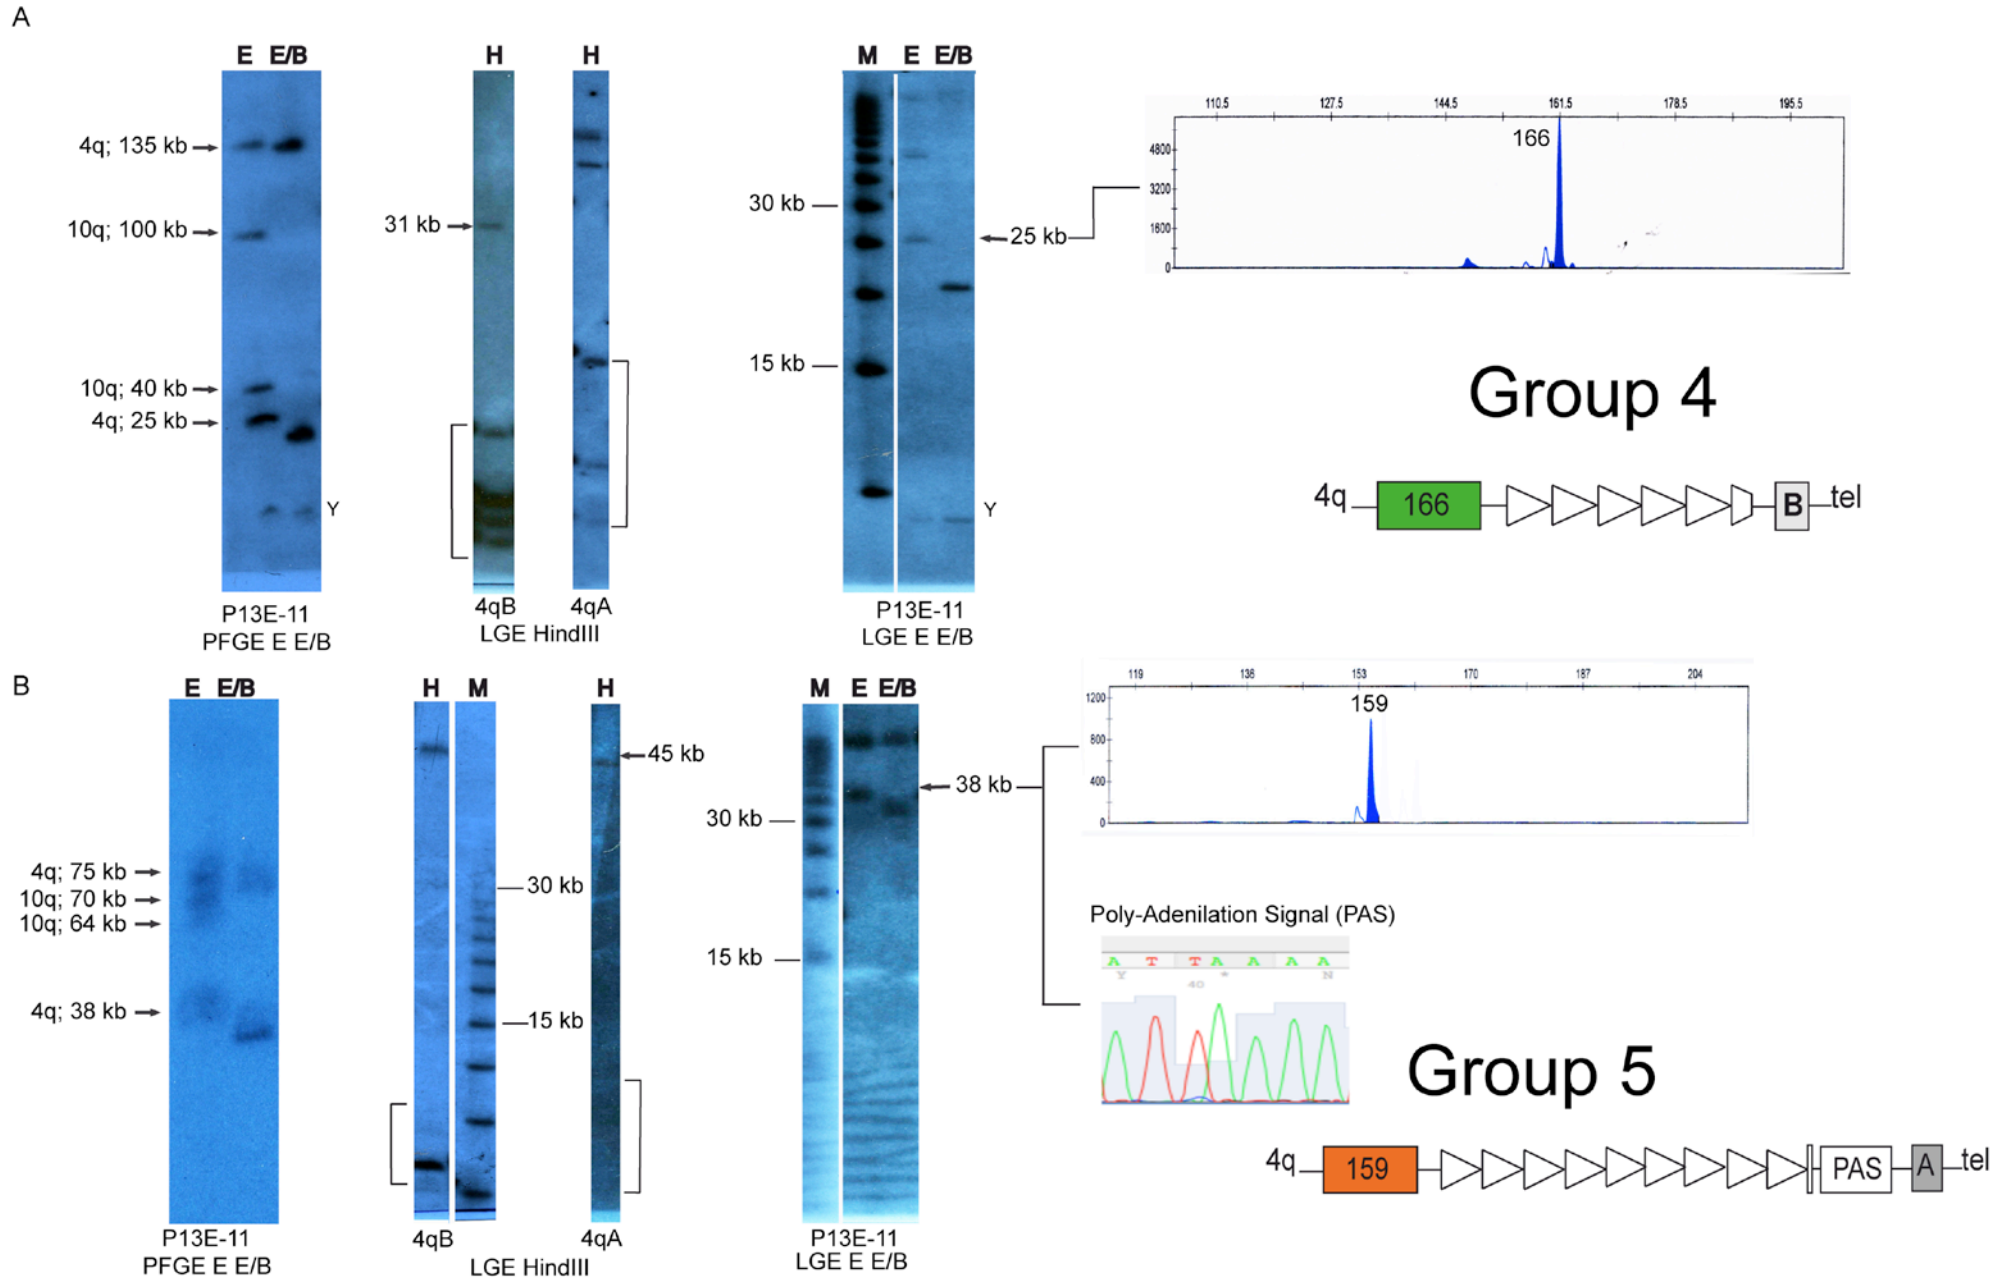

A) FSHD patient with a D4Z4 allele of 25 kb and 4B166 haplotype; B) FSHD patient with a D4Z4 allele of 38 kb and 4A159PAS haplotype. Non-4q and -10q cross-hybridization fragments with probes 4qA and 4qB are in brackets. Cross-hybridizing Y-chromosome-derived fragments with probe p13E-11 in male are indicated as “Y”.

**Figure S11:** Examples of genotype and haplotype.

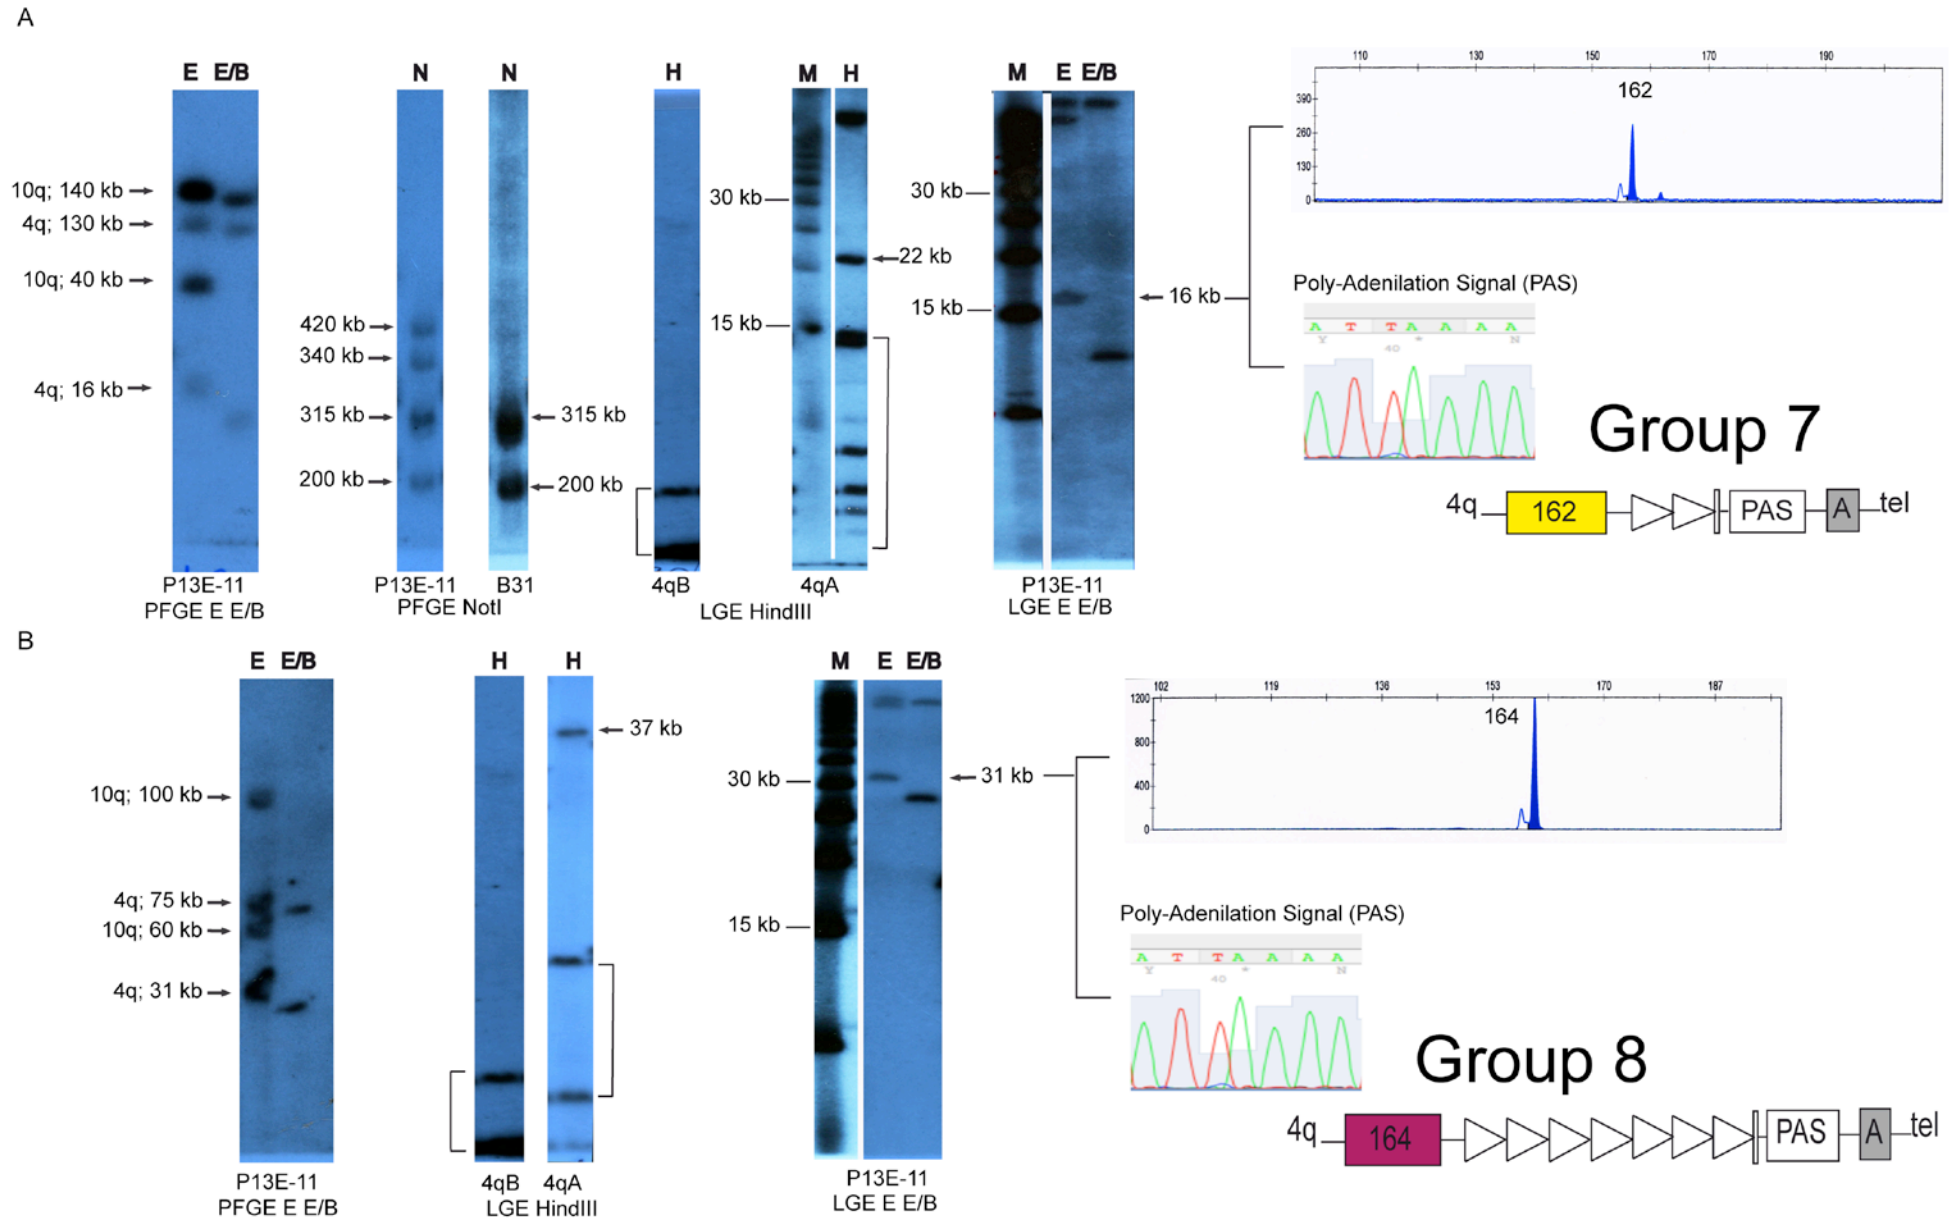

A) FSHD patient with a D4Z4 allele of 16 kb and 4A162PAS haplotype; B) FSHD patient with a D4Z4 allele of 31 kb and 4A164PAS haplotype. Non-4q and -10q cross-hybridization fragments with probes 4qA and 4qB are in brackets.



**Figure S12:** Examples of genotype and haplotype.

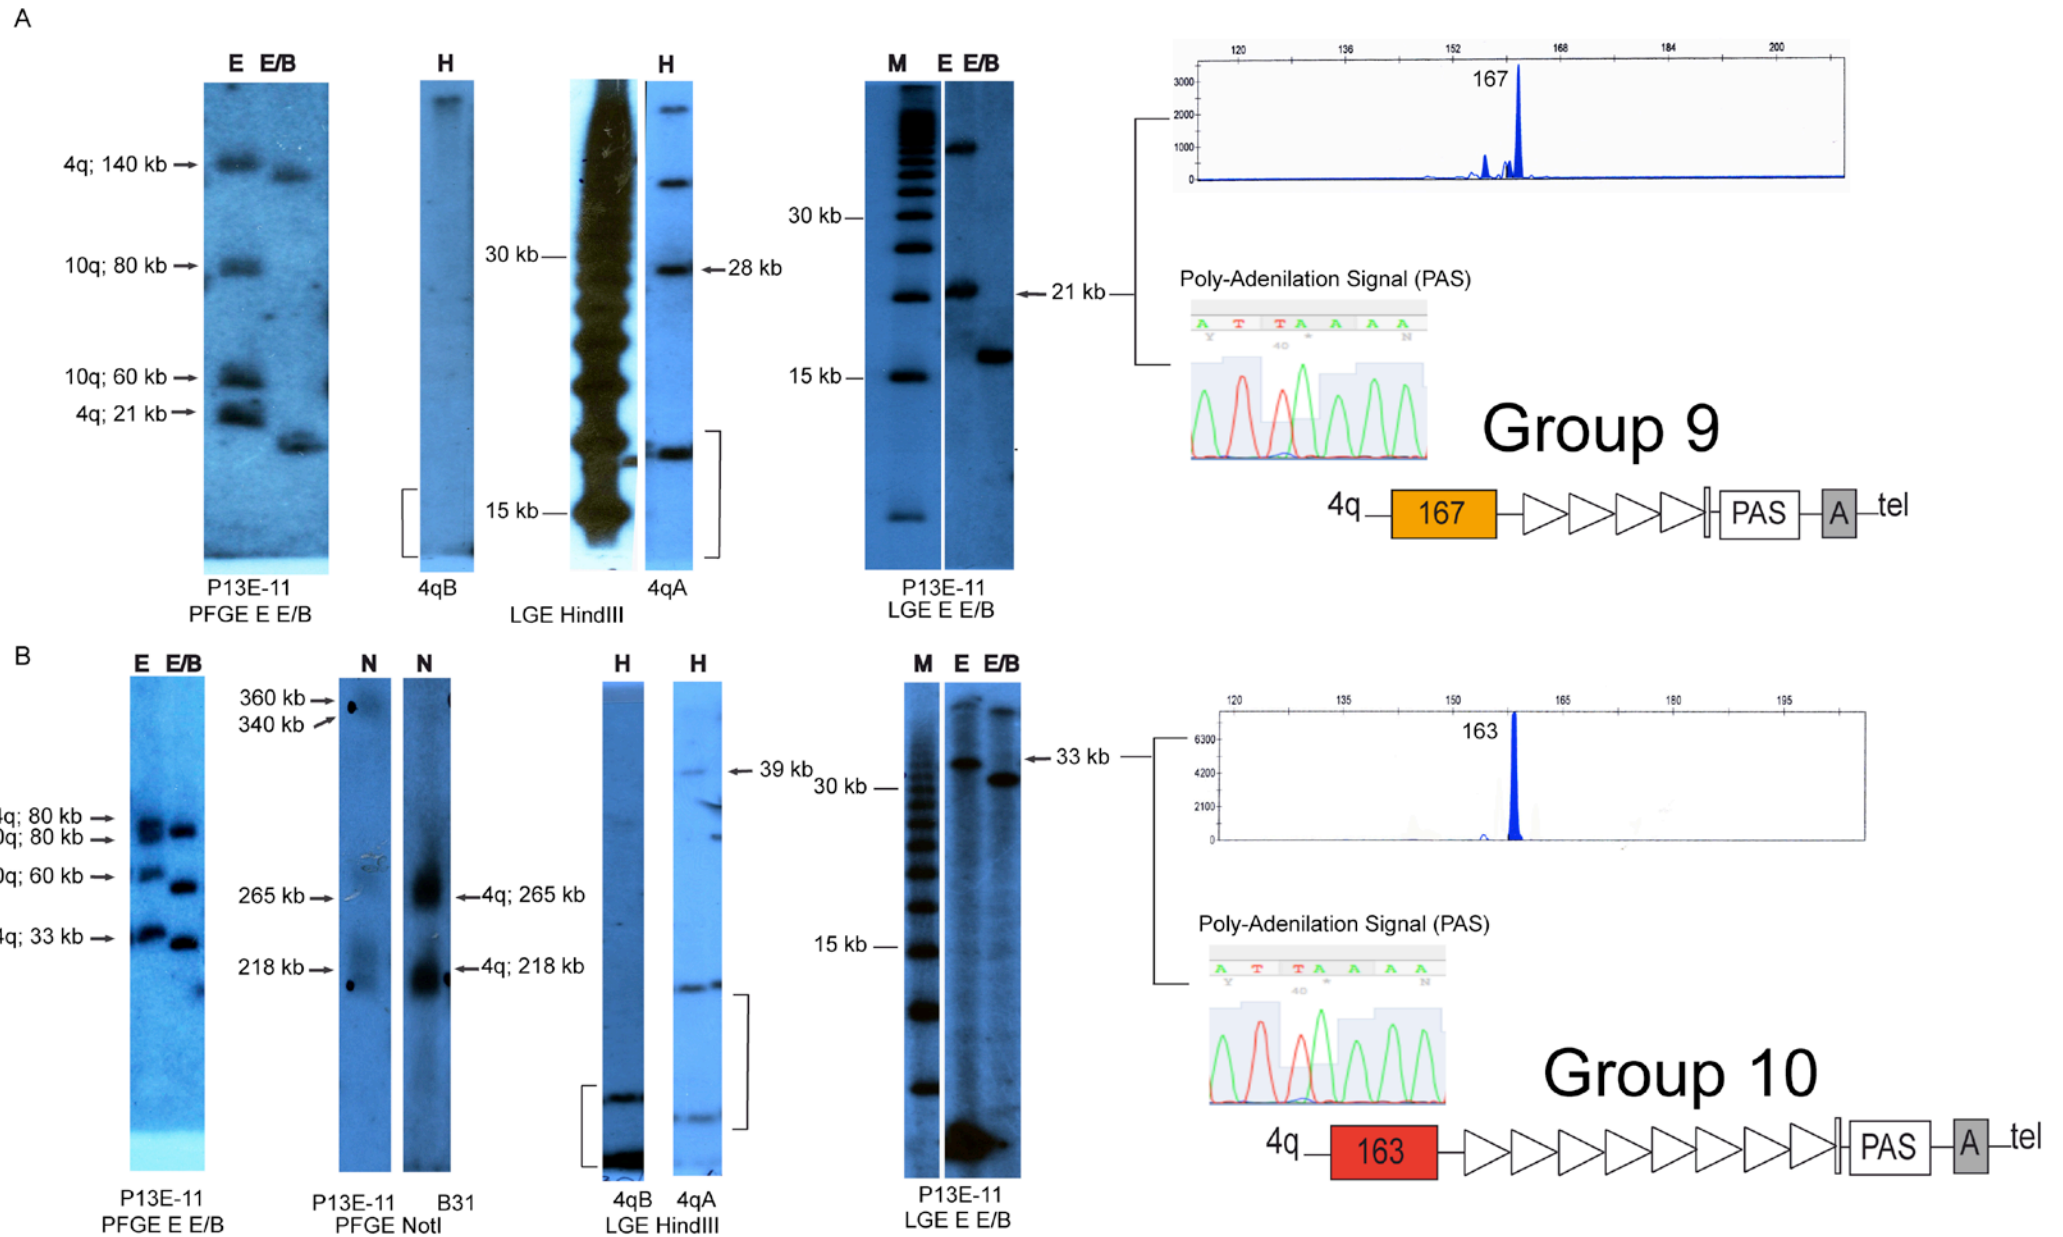

A) FSHD patient with a D4Z4 allele of 21 kb and 4A167PAS haplotype; B) FSHD patient with a D4Z4 allele of 33 kb and 4A163PAS haplotype. Non-4q and -10q cross-hybridization fragments with probes 4qA and 4qB are in brackets.

**Table S1:** Clinical and molecular analysis of the 25 healthy subjects carriers of a D4Z4-reduced allele.

| ID-sample | Age | Sex | D4Z4 repeat unit | Haplotype | FSHD Score      |                             |                         |                         |                           |                              | Total |
|-----------|-----|-----|------------------|-----------|-----------------|-----------------------------|-------------------------|-------------------------|---------------------------|------------------------------|-------|
|           |     |     |                  |           | Facial weakness | Scapular girdle involvement | Upper limbs involvement | Distal legs involvement | Pelvic girdle involvement | Abdominal muscle involvement |       |
| CTRL 1    | 41  | F   | 4-8              | A161PAS   | 0               | 0                           | 0                       | 0                       | 0                         | 0                            | 0     |
| CTRL 2    | 52  | F   | 4-8              | A166PAS   | 0               | 0                           | 0                       | 0                       | 0                         | 0                            | 0     |
| CTRL 3    | 65  | M   | 4-8              | A161PAS   | 0               | 0                           | 0                       | 0                       | 0                         | 0                            | 0     |
| CTRL 4    | 64  | F   | 4-8              | A161PAS   | 0               | 0                           | 0                       | 0                       | 0                         | 0                            | 0     |
| CTRL 5    | 43  | M   | 4-8              | A161PAS   | 0               | 0                           | 0                       | 0                       | 0                         | 0                            | 0     |
| CTRL 6    | 61  | M   | 4-8              | B166      | 0               | 0                           | 0                       | 0                       | 0                         | 0                            | 0     |
| CTRL 7    | 63  | F   | 4-8              | A161PAS   | 0               | 0                           | 0                       | 0                       | 0                         | 0                            | 0     |
| CTRL 8    | 66  | F   | 4-8              | A161PAS   | 0               | 0                           | 0                       | 0                       | 0                         | 0                            | 0     |
| CTRL 9    | 66  | M   | 4-8              | A161PAS   | 0               | 0                           | 0                       | 0                       | 0                         | 0                            | 0     |
| CTRL 10   | 58  | F   | 4-8              | B163      | 0               | 0                           | 0                       | 0                       | 0                         | 0                            | 0     |
| CTRL 11   | 55  | F   | 4-8              | A161PAS   | 0               | 0                           | 0                       | 0                       | 0                         | 0                            | 0     |
| CTRL 12   | 78  | M   | 4-8              | A166PAS   | 0               | 0                           | 0                       | 0                       | 0                         | 0                            | 0     |
| CTRL 13   | 52  | M   | 4-8              | B163      | 0               | 0                           | 0                       | 0                       | 0                         | 0                            | 0     |
| CTRL 14   | 45  | F   | 4-8              | A161PAS   | 0               | 0                           | 0                       | 0                       | 0                         | 0                            | 0     |
| CTRL 15   | 68  | F   | 4-8              | A161PAS   | 0               | 0                           | 0                       | 0                       | 0                         | 0                            | 0     |

|         |    |   |     |         |   |   |   |   |   |   |   |   |
|---------|----|---|-----|---------|---|---|---|---|---|---|---|---|
| CTRL 16 | 35 | F | 4-8 | A166PAS | 0 | 0 | 0 | 0 | 0 | 0 | 0 | 0 |
| CTRL 17 | 71 | M | 4-8 | A166PAS | 0 | 0 | 0 | 0 | 0 | 0 | 0 | 0 |
| CTRL 18 | 46 | M | 4-8 | B161    | 0 | 0 | 0 | 0 | 0 | 0 | 0 | 0 |
| CTRL 19 | 33 | M | 4-8 | B163    | 0 | 0 | 0 | 0 | 0 | 0 | 0 | 0 |
| CTRL 20 | 76 | M | 4-8 | A166PAS | 0 | 0 | 0 | 0 | 0 | 0 | 0 | 0 |
| CTRL 21 | 38 | M | 4-8 | B163    | 0 | 0 | 0 | 0 | 0 | 0 | 0 | 0 |
| CTRL 22 | 52 | M | 4-8 | A161PAS | 0 | 0 | 0 | 0 | 0 | 0 | 0 | 0 |
| CTRL 23 | 36 | M | 4-8 | A166PAS | 0 | 0 | 0 | 0 | 0 | 0 | 0 | 0 |
| CTRL 24 | 31 | M | 4-8 | A166PAS | 0 | 0 | 0 | 0 | 0 | 0 | 0 | 0 |
| CTRL 25 | 39 | M | 4-8 | B166    | 0 | 0 | 0 | 0 | 0 | 0 | 0 | 0 |

**Table S2:** Clinical and molecular analysis of the 253 FSHD patients.

| ID-sample | Age | Sex | D4Z4 repeat unit | Haplotype | FSHD Score      |                             |                         |                         |                           |                              | Total     |
|-----------|-----|-----|------------------|-----------|-----------------|-----------------------------|-------------------------|-------------------------|---------------------------|------------------------------|-----------|
|           |     |     |                  |           | Facial weakness | Scapular girdle involvement | Upper limbs involvement | Distal legs involvement | Pelvic girdle involvement | Abdominal muscle involvement |           |
| FSHD 1    | 43  | M   | 1-3              | A166PAS   | 2               | 3                           | 1                       | 2                       | 4                         | 1                            | <b>13</b> |
| FSHD 2    | 41  | F   | 1-3              | A166PAS   | 1               | 3                           | 1                       | 1                       | 2                         | 1                            | <b>9</b>  |
| FSHD 3    | 47  | F   | 1-3              | A166PAS   | 2               | 3                           | 2                       | 2                       | 4                         | 1                            | <b>14</b> |
| FSHD 4    | 67  | M   | 1-3              | A161PAS   | 1               | 3                           | 2                       | 2                       | 4                         | 1                            | <b>13</b> |
| FSHD 5    | 35  | M   | 1-3              | A162PAS   | 2               | 2                           | 2                       | 1                       | 3                         | 1                            | <b>11</b> |
| FSHD 6    | 38  | F   | 1-3              | A161PAS   | 2               | 2                           | 1                       | 1                       | 3                         | 0                            | <b>9</b>  |
| FSHD 7    | 61  | F   | 1-3              | A166PAS   | 2               | 2                           | 0                       | 2                       | 2                         | 0                            | <b>8</b>  |
| FSHD 8    | 14  | M   | 1-3              | A161PAS   | 2               | 2                           | 1                       | 2                       | 5                         | 1                            | <b>13</b> |
| FSHD 9    | 36  | M   | 1-3              | A161PAS   | 1               | 1                           | 0                       | 0                       | 0                         | 1                            | <b>3</b>  |
| FSHD 10   | 51  | F   | 1-3              | A166PAS   | 2               | 2                           | 1                       | 1                       | 2                         | 1                            | <b>9</b>  |
| FSHD 11   | 23  | F   | 1-3              | A166PAS   | 1               | 2                           | 0                       | 0                       | 0                         | 0                            | <b>3</b>  |
| FSHD 12   | 11  | F   | 1-3              | A161PAS   | 2               | 2                           | 1                       | 2                       | 5                         | 0                            | <b>12</b> |
| FSHD 13   | 70  | F   | 1-3              | A161PAS   | 2               | 2                           | 0                       | 1                       | 1                         | 1                            | <b>7</b>  |
| FSHD 14   | 41  | M   | 1-3              | A161PAS   | 1               | 3                           | 2                       | 1                       | 2                         | 1                            | <b>10</b> |
| FSHD 15   | 43  | F   | 1-3              | A161PAS   | 2               | 2                           | 0                       | 1                       | 2                         | 0                            | <b>7</b>  |

|         |    |   |     |         |   |   |   |   |   |   |    |
|---------|----|---|-----|---------|---|---|---|---|---|---|----|
| FSHD 16 | 49 | F | 1-3 | A161PAS | 1 | 3 | 1 | 2 | 4 | 0 | 11 |
| FSHD 17 | 35 | F | 1-3 | A161PAS | 2 | 2 | 1 | 1 | 0 | 1 | 7  |
| FSHD 18 | 77 | F | 1-3 | A161PAS | 1 | 3 | 1 | 2 | 5 | 1 | 13 |
| FSHD 19 | 53 | M | 1-3 | A161PAS | 2 | 0 | 2 | 2 | 5 | 0 | 11 |
| FSHD 20 | 25 | M | 1-3 | A162PAS | 1 | 2 | 2 | 1 | 2 | 0 | 8  |
| FSHD 21 | 23 | M | 1-3 | A166PAS | 1 | 2 | 1 | 1 | 0 | 1 | 6  |
| FSHD 22 | 27 | F | 1-3 | A161PAS | 2 | 2 | 0 | 1 | 2 | 1 | 8  |
| FSHD 23 | 45 | F | 1-3 | A161PAS | 2 | 2 | 0 | 2 | 2 | 1 | 9  |
| FSHD 24 | 49 | M | 1-3 | A161PAS | 2 | 2 | 2 | 1 | 2 | 1 | 10 |
| FSHD 25 | 25 | M | 1-3 | A161PAS | 2 | 2 | 0 | 0 | 0 | 1 | 5  |
| FSHD 26 | 32 | F | 1-3 | A166PAS | 1 | 2 | 0 | 0 | 0 | 0 | 3  |
| FSHD 27 | 22 | M | 1-3 | A166PAS | 2 | 3 | 2 | 2 | 2 | 1 | 12 |
| FSHD 28 | 16 | F | 1-3 | A161PAS | 2 | 2 | 0 | 0 | 0 | 1 | 5  |
| FSHD 29 | 39 | F | 4-8 | A161PAS | 1 | 2 | 0 | 1 | 2 | 1 | 7  |
| FSHD 30 | 49 | F | 4-8 | A167PAS | 2 | 3 | 2 | 2 | 5 | 0 | 14 |
| FSHD 31 | 68 | M | 4-8 | A161PAS | 1 | 3 | 2 | 2 | 4 | 0 | 12 |
| FSHD 32 | 57 | M | 4-8 | A166PAS | 2 | 2 | 1 | 1 | 4 | 1 | 11 |
| FSHD 33 | 46 | F | 4-8 | A161PAS | 1 | 2 | 0 | 0 | 0 | 0 | 3  |
| FSHD 34 | 18 | F | 4-8 | A161PAS | 1 | 1 | 0 | 1 | 1 | 1 | 5  |

|         |    |   |     |         |   |   |   |   |   |   |    |
|---------|----|---|-----|---------|---|---|---|---|---|---|----|
| FSHD 35 | 59 | M | 4-8 | A166PAS | 1 | 3 | 1 | 2 | 4 | 0 | 11 |
| FSHD 36 | 34 | F | 4-8 | A166PAS | 2 | 2 | 0 | 1 | 0 | 1 | 6  |
| FSHD 37 | 56 | M | 4-8 | A161PAS | 1 | 2 | 2 | 2 | 3 | 1 | 11 |
| FSHD 38 | 58 | F | 4-8 | A166PAS | 1 | 3 | 2 | 2 | 4 | 1 | 13 |
| FSHD 39 | 61 | F | 4-8 | A161PAS | 1 | 2 | 0 | 1 | 2 | 0 | 6  |
| FSHD 40 | 55 | F | 4-8 | A161PAS | 1 | 3 | 2 | 2 | 4 | 1 | 13 |
| FSHD 41 | 79 | F | 4-8 | A161PAS | 1 | 2 | 1 | 2 | 5 | 0 | 11 |
| FSHD 42 | 76 | F | 4-8 | A161PAS | 2 | 3 | 1 | 2 | 2 | 0 | 10 |
| FSHD 43 | 41 | F | 4-8 | A161PAS | 2 | 2 | 0 | 1 | 2 | 0 | 7  |
| FSHD 44 | 38 | M | 4-8 | A161PAS | 1 | 2 | 1 | 2 | 3 | 1 | 10 |
| FSHD 45 | 52 | F | 4-8 | A166PAS | 1 | 2 | 0 | 1 | 0 | 0 | 4  |
| FSHD 46 | 53 | M | 4-8 | A161PAS | 1 | 3 | 1 | 0 | 1 | 1 | 7  |
| FSHD 47 | 62 | F | 4-8 | A161PAS | 1 | 2 | 0 | 2 | 4 | 1 | 10 |
| FSHD 48 | 63 | F | 4-8 | A166PAS | 2 | 3 | 2 | 2 | 5 | 1 | 15 |
| FSHD 49 | 65 | F | 4-8 | A161PAS | 1 | 3 | 2 | 2 | 3 | 1 | 12 |
| FSHD 50 | 37 | F | 4-8 | A161PAS | 1 | 2 | 0 | 1 | 2 | 1 | 7  |
| FSHD 51 | 46 | F | 4-8 | A166PAS | 1 | 1 | 0 | 1 | 2 | 0 | 5  |
| FSHD 52 | 73 | F | 4-8 | A161PAS | 1 | 3 | 0 | 2 | 2 | 0 | 8  |
| FSHD 53 | 53 | M | 4-8 | A161PAS | 1 | 3 | 0 | 1 | 1 | 1 | 7  |

|         |    |   |     |         |   |   |   |   |   |   |    |
|---------|----|---|-----|---------|---|---|---|---|---|---|----|
| FSHD 54 | 74 | F | 4-8 | A161PAS | 2 | 3 | 2 | 2 | 2 | 0 | 11 |
| FSHD 55 | 38 | M | 4-8 | A161PAS | 1 | 1 | 0 | 1 | 0 | 0 | 3  |
| FSHD 56 | 29 | M | 4-8 | A161PAS | 1 | 2 | 1 | 1 | 2 | 1 | 8  |
| FSHD 57 | 70 | F | 4-8 | A166PAS | 1 | 2 | 2 | 2 | 4 | 0 | 11 |
| FSHD 58 | 69 | M | 4-8 | A161PAS | 2 | 2 | 2 | 2 | 5 | 1 | 14 |
| FSHD 59 | 66 | F | 4-8 | A166PAS | 1 | 2 | 1 | 1 | 4 | 0 | 9  |
| FSHD 60 | 44 | M | 4-8 | A167PAS | 2 | 3 | 1 | 2 | 4 | 1 | 13 |
| FSHD 61 | 30 | M | 4-8 | A166PAS | 0 | 2 | 0 | 1 | 0 | 1 | 4  |
| FSHD 62 | 65 | M | 4-8 | A166PAS | 1 | 2 | 1 | 1 | 0 | 0 | 5  |
| FSHD 63 | 65 | M | 4-8 | A166PAS | 2 | 3 | 1 | 2 | 5 | 1 | 14 |
| FSHD 64 | 74 | F | 4-8 | A161PAS | 1 | 1 | 0 | 0 | 2 | 0 | 4  |
| FSHD 65 | 47 | M | 4-8 | A161PAS | 1 | 2 | 0 | 0 | 0 | 0 | 3  |
| FSHD 66 | 56 | M | 4-8 | A166PAS | 2 | 3 | 1 | 1 | 2 | 1 | 10 |
| FSHD 67 | 38 | F | 4-8 | A161PAS | 0 | 2 | 0 | 0 | 0 | 1 | 3  |
| FSHD 68 | 62 | F | 4-8 | A161PAS | 2 | 3 | 2 | 2 | 3 | 1 | 13 |
| FSHD 69 | 69 | F | 4-8 | A163PAS | 1 | 3 | 1 | 1 | 4 | 0 | 10 |
| FSHD 70 | 27 | M | 4-8 | A161PAS | 1 | 1 | 0 | 0 | 0 | 0 | 2  |
| FSHD 71 | 64 | F | 4-8 | A161PAS | 1 | 3 | 1 | 2 | 4 | 1 | 12 |
| FSHD 72 | 46 | M | 4-8 | A162PAS | 1 | 2 | 0 | 1 | 0 | 0 | 4  |

|         |    |   |     |         |   |   |   |   |   |   |           |
|---------|----|---|-----|---------|---|---|---|---|---|---|-----------|
| FSHD 73 | 69 | F | 4-8 | A161PAS | 1 | 3 | 1 | 2 | 5 | 0 | <b>12</b> |
| FSHD 74 | 43 | F | 4-8 | A166PAS | 1 | 3 | 0 | 1 | 2 | 0 | <b>7</b>  |
| FSHD 75 | 36 | M | 4-8 | A164PAS | 1 | 2 | 1 | 1 | 2 | 1 | <b>8</b>  |
| FSHD 76 | 74 | F | 4-8 | A166PAS | 2 | 1 | 1 | 2 | 5 | 0 | <b>11</b> |
| FSHD 77 | 51 | M | 4-8 | A166PAS | 2 | 2 | 1 | 1 | 1 | 1 | <b>8</b>  |
| FSHD 78 | 62 | M | 4-8 | A161PAS | 1 | 1 | 2 | 2 | 5 | 1 | <b>12</b> |
| FSHD 79 | 25 | M | 4-8 | A161PAS | 1 | 0 | 0 | 0 | 0 | 0 | <b>1</b>  |
| FSHD 80 | 80 | M | 4-8 | A166PAS | 2 | 3 | 1 | 2 | 5 | 0 | <b>13</b> |
| FSHD 81 | 50 | M | 4-8 | A161PAS | 1 | 3 | 2 | 2 | 1 | 1 | <b>10</b> |
| FSHD 82 | 27 | M | 4-8 | A161PAS | 1 | 1 | 0 | 0 | 0 | 1 | <b>3</b>  |
| FSHD 83 | 45 | M | 4-8 | A161PAS | 1 | 3 | 2 | 1 | 2 | 1 | <b>10</b> |
| FSHD 84 | 32 | F | 4-8 | A164PAS | 1 | 0 | 0 | 0 | 0 | 0 | <b>1</b>  |
| FSHD 85 | 40 | M | 4-8 | A161PAS | 1 | 2 | 0 | 1 | 2 | 1 | <b>7</b>  |
| FSHD 86 | 64 | F | 4-8 | A161PAS | 0 | 1 | 1 | 0 | 2 | 0 | <b>4</b>  |
| FSHD 87 | 48 | F | 4-8 | A161PAS | 1 | 0 | 0 | 0 | 0 | 0 | <b>1</b>  |
| FSHD 88 | 57 | F | 4-8 | A166PAS | 1 | 2 | 1 | 1 | 0 | 1 | <b>6</b>  |
| FSHD 89 | 31 | F | 4-8 | A161PAS | 2 | 2 | 0 | 1 | 0 | 1 | <b>6</b>  |
| FSHD 90 | 23 | F | 4-8 | A161PAS | 2 | 2 | 0 | 1 | 2 | 1 | <b>8</b>  |
| FSHD 91 | 54 | F | 4-8 | A166PAS | 0 | 1 | 0 | 1 | 2 | 1 | <b>5</b>  |



|          |    |   |     |         |   |   |   |   |   |   |    |
|----------|----|---|-----|---------|---|---|---|---|---|---|----|
| FSHD 92  | 4  | M | 4-8 | A166PAS | 0 | 0 | 0 | 1 | 0 | 0 | 1  |
| FSHD 93  | 71 | M | 4-8 | A162PAS | 1 | 2 | 1 | 0 | 1 | 0 | 5  |
| FSHD 94  | 49 | F | 4-8 | A166PAS | 2 | 3 | 0 | 2 | 4 | 1 | 12 |
| FSHD 95  | 81 | M | 4-8 | A166PAS | 1 | 1 | 1 | 2 | 1 | 0 | 6  |
| FSHD 96  | 62 | F | 4-8 | A161PAS | 2 | 2 | 1 | 2 | 4 | 1 | 12 |
| FSHD 97  | 40 | M | 4-8 | A164PAS | 2 | 2 | 1 | 2 | 0 | 1 | 8  |
| FSHD 98  | 68 | F | 4-8 | A161PAS | 1 | 2 | 1 | 1 | 2 | 0 | 7  |
| FSHD 99  | 33 | M | 4-8 | A161PAS | 0 | 2 | 0 | 0 | 0 | 0 | 2  |
| FSHD 100 | 37 | M | 4-8 | A161PAS | 2 | 1 | 1 | 1 | 0 | 0 | 5  |
| FSHD 101 | 67 | F | 4-8 | A162PAS | 1 | 2 | 1 | 1 | 2 | 0 | 7  |
| FSHD 102 | 47 | M | 4-8 | A166PAS | 1 | 2 | 0 | 1 | 0 | 0 | 4  |
| FSHD 103 | 48 | F | 4-8 | A166PAS | 0 | 1 | 0 | 0 | 0 | 0 | 1  |
| FSHD 104 | 25 | F | 4-8 | A161PAS | 2 | 2 | 0 | 0 | 0 | 1 | 5  |
| FSHD 105 | 37 | M | 4-8 | A161PAS | 2 | 3 | 1 | 1 | 2 | 0 | 9  |
| FSHD 106 | 49 | F | 4-8 | A161PAS | 1 | 2 | 1 | 1 | 4 | 1 | 10 |
| FSHD 107 | 34 | M | 4-8 | A162PAS | 2 | 2 | 2 | 2 | 3 | 1 | 12 |
| FSHD 108 | 58 | M | 4-8 | A161PAS | 1 | 1 | 1 | 1 | 0 | 0 | 4  |
| FSHD 109 | 70 | F | 4-8 | A161PAS | 1 | 0 | 0 | 2 | 2 | 1 | 6  |
| FSHD 110 | 39 | M | 4-8 | A161PAS | 2 | 3 | 2 | 0 | 2 | 1 | 10 |

|          |    |   |     |         |   |   |   |   |   |   |           |
|----------|----|---|-----|---------|---|---|---|---|---|---|-----------|
| FSHD 111 | 56 | F | 4-8 | A161PAS | 1 | 2 | 1 | 1 | 1 | 0 | <b>6</b>  |
| FSHD 112 | 42 | F | 4-8 | A161PAS | 2 | 1 | 1 | 2 | 0 | 0 | <b>6</b>  |
| FSHD 113 | 63 | F | 4-8 | A166PAS | 1 | 2 | 0 | 2 | 3 | 1 | <b>9</b>  |
| FSHD 114 | 50 | M | 4-8 | A166PAS | 1 | 2 | 1 | 0 | 2 | 0 | <b>6</b>  |
| FSHD 115 | 36 | F | 4-8 | A161PAS | 1 | 2 | 0 | 1 | 2 | 0 | <b>6</b>  |
| FSHD 116 | 13 | M | 4-8 | A161PAS | 1 | 1 | 0 | 0 | 0 | 1 | <b>3</b>  |
| FSHD 117 | 44 | M | 4-8 | A162PAS | 2 | 2 | 1 | 2 | 2 | 1 | <b>10</b> |
| FSHD 118 | 41 | M | 4-8 | A166PAS | 1 | 1 | 0 | 1 | 0 | 1 | <b>4</b>  |
| FSHD 119 | 73 | F | 4-8 | A161PAS | 2 | 3 | 1 | 2 | 4 | 1 | <b>13</b> |
| FSHD 120 | 73 | F | 4-8 | A161PAS | 1 | 3 | 0 | 2 | 5 | 1 | <b>12</b> |
| FSHD 121 | 44 | M | 4-8 | A161PAS | 0 | 2 | 0 | 0 | 0 | 0 | <b>2</b>  |
| FSHD 122 | 56 | F | 4-8 | A161PAS | 1 | 2 | 2 | 1 | 2 | 1 | <b>9</b>  |
| FSHD 123 | 52 | M | 4-8 | A161PAS | 1 | 2 | 2 | 2 | 2 | 1 | <b>10</b> |
| FSHD 124 | 31 | F | 4-8 | A166PAS | 2 | 2 | 0 | 0 | 0 | 1 | <b>5</b>  |
| FSHD 125 | 33 | M | 4-8 | A166PAS | 2 | 2 | 2 | 2 | 3 | 0 | <b>11</b> |
| FSHD 126 | 43 | M | 4-8 | A162PAS | 1 | 0 | 1 | 0 | 2 | 0 | <b>4</b>  |
| FSHD 127 | 67 | M | 4-8 | A161PAS | 1 | 2 | 1 | 2 | 3 | 1 | <b>10</b> |
| FSHD 128 | 21 | M | 4-8 | A161PAS | 1 | 2 | 0 | 0 | 0 | 1 | <b>4</b>  |
| FSHD 129 | 46 | M | 4-8 | A161PAS | 1 | 3 | 1 | 1 | 0 | 1 | <b>7</b>  |

|          |    |   |     |         |   |   |   |   |   |   |           |
|----------|----|---|-----|---------|---|---|---|---|---|---|-----------|
| FSHD 130 | 50 | M | 4-8 | A161PAS | 1 | 2 | 1 | 0 | 0 | 1 | <b>5</b>  |
| FSHD 131 | 56 | M | 4-8 | A161PAS | 1 | 2 | 1 | 1 | 0 | 1 | <b>6</b>  |
| FSHD 132 | 32 | M | 4-8 | A166PAS | 1 | 2 | 0 | 0 | 0 | 0 | <b>3</b>  |
| FSHD 133 | 62 | F | 4-8 | A161PAS | 1 | 1 | 0 | 1 | 2 | 1 | <b>6</b>  |
| FSHD 134 | 28 | M | 4-8 | A162PAS | 1 | 0 | 0 | 0 | 0 | 0 | <b>1</b>  |
| FSHD 135 | 22 | F | 4-8 | A161PAS | 1 | 0 | 0 | 0 | 0 | 1 | <b>2</b>  |
| FSHD 136 | 40 | M | 4-8 | A161PAS | 1 | 1 | 1 | 1 | 0 | 0 | <b>4</b>  |
| FSHD 137 | 45 | M | 4-8 | B166    | 0 | 3 | 0 | 0 | 0 | 0 | <b>3</b>  |
| FSHD 138 | 45 | M | 4-8 | A161PAS | 1 | 2 | 0 | 0 | 0 | 1 | <b>4</b>  |
| FSHD 139 | 62 | F | 4-8 | A161PAS | 1 | 2 | 1 | 2 | 0 | 0 | <b>6</b>  |
| FSHD 140 | 69 | M | 4-8 | B163    | 0 | 3 | 0 | 1 | 2 | 0 | <b>6</b>  |
| FSHD 141 | 23 | F | 4-8 | A161PAS | 1 | 2 | 0 | 0 | 0 | 1 | <b>4</b>  |
| FSHD 142 | 36 | M | 4-8 | A166PAS | 1 | 3 | 2 | 2 | 3 | 0 | <b>11</b> |
| FSHD 143 | 54 | F | 4-8 | A162PAS | 2 | 2 | 0 | 1 | 0 | 0 | <b>5</b>  |
| FSHD 144 | 12 | M | 4-8 | B166    | 0 | 2 | 0 | 1 | 0 | 0 | <b>3</b>  |
| FSHD 145 | 25 | M | 4-8 | A161PAS | 1 | 0 | 0 | 0 | 0 | 0 | <b>1</b>  |
| FSHD 146 | 45 | M | 4-8 | A161PAS | 1 | 1 | 0 | 1 | 1 | 0 | <b>4</b>  |
| FSHD 147 | 50 | F | 4-8 | A161PAS | 1 | 3 | 0 | 0 | 0 | 1 | <b>5</b>  |
| FSHD 148 | 58 | M | 4-8 | A161PAS | 2 | 2 | 2 | 2 | 0 | 1 | <b>9</b>  |

|          |    |   |     |         |   |   |   |   |   |   |           |
|----------|----|---|-----|---------|---|---|---|---|---|---|-----------|
| FSHD 149 | 40 | F | 4-8 | A161PAS | 2 | 2 | 1 | 1 | 3 | 1 | <b>10</b> |
| FSHD 150 | 53 | F | 4-8 | A166PAS | 1 | 1 | 1 | 2 | 5 | 0 | <b>10</b> |
| FSHD 151 | 52 | M | 4-8 | A161PAS | 1 | 2 | 1 | 1 | 2 | 1 | <b>8</b>  |
| FSHD 152 | 23 | M | 4-8 | A166PAS | 2 | 2 | 1 | 0 | 0 | 1 | <b>6</b>  |
| FSHD 153 | 54 | F | 4-8 | A166PAS | 1 | 2 | 0 | 1 | 2 | 0 | <b>6</b>  |
| FSHD 154 | 74 | F | 4-8 | A161PAS | 2 | 2 | 2 | 2 | 4 | 1 | <b>13</b> |
| FSHD 155 | 16 | M | 4-8 | A161PAS | 2 | 3 | 0 | 0 | 0 | 0 | <b>5</b>  |
| FSHD 156 | 48 | F | 4-8 | A161PAS | 1 | 1 | 0 | 1 | 2 | 0 | <b>5</b>  |
| FSHD 157 | 57 | M | 4-8 | A161PAS | 0 | 2 | 0 | 1 | 2 | 0 | <b>5</b>  |
| FSHD 158 | 64 | F | 4-8 | A166PAS | 1 | 2 | 0 | 1 | 2 | 0 | <b>6</b>  |
| FSHD 159 | 43 | F | 4-8 | A161PAS | 2 | 2 | 0 | 1 | 2 | 1 | <b>8</b>  |
| FSHD 160 | 34 | M | 4-8 | A166PAS | 1 | 2 | 0 | 1 | 2 | 1 | <b>7</b>  |
| FSHD 161 | 55 | M | 4-8 | A161PAS | 1 | 2 | 1 | 2 | 4 | 1 | <b>11</b> |
| FSHD 162 | 80 | F | 4-8 | A166PAS | 2 | 3 | 2 | 2 | 5 | 0 | <b>14</b> |
| FSHD 163 | 75 | F | 4-8 | A161PAS | 2 | 2 | 1 | 1 | 2 | 0 | <b>8</b>  |
| FSHD 164 | 70 | F | 4-8 | A161PAS | 1 | 3 | 0 | 2 | 4 | 0 | <b>10</b> |
| FSHD 165 | 38 | M | 4-8 | A161PAS | 2 | 3 | 0 | 0 | 0 | 1 | <b>6</b>  |
| FSHD 166 | 27 | M | 4-8 | A161PAS | 1 | 2 | 0 | 0 | 0 | 0 | <b>3</b>  |
| FSHD 167 | 34 | M | 4-8 | A161PAS | 0 | 2 | 0 | 0 | 0 | 0 | <b>2</b>  |

|          |    |   |     |         |   |   |   |   |   |   |    |
|----------|----|---|-----|---------|---|---|---|---|---|---|----|
| FSHD 168 | 25 | M | 4-8 | A161PAS | 0 | 1 | 0 | 0 | 0 | 0 | 1  |
| FSHD 169 | 54 | F | 4-8 | A161PAS | 1 | 1 | 0 | 2 | 2 | 0 | 6  |
| FSHD 170 | 25 | M | 4-8 | A161PAS | 1 | 2 | 0 | 1 | 0 | 1 | 5  |
| FSHD 171 | 44 | M | 4-8 | A161PAS | 1 | 2 | 1 | 0 | 0 | 0 | 4  |
| FSHD 172 | 89 | F | 4-8 | A161PAS | 1 | 3 | 1 | 0 | 2 | 0 | 7  |
| FSHD 173 | 39 | M | 4-8 | A162PAS | 1 | 1 | 1 | 0 | 0 | 0 | 3  |
| FSHD 174 | 66 | M | 4-8 | A166PAS | 0 | 3 | 2 | 2 | 2 | 0 | 9  |
| FSHD 175 | 47 | M | 4-8 | A166PAS | 0 | 2 | 0 | 0 | 0 | 0 | 3  |
| FSHD 176 | 40 | M | 4-8 | A161PAS | 1 | 2 | 1 | 2 | 2 | 0 | 8  |
| FSHD 177 | 55 | F | 4-8 | A161PAS | 2 | 2 | 1 | 2 | 5 | 0 | 12 |
| FSHD 178 | 42 | M | 4-8 | A166PAS | 1 | 2 | 0 | 0 | 0 | 1 | 4  |
| FSHD 179 | 48 | M | 4-8 | A164PAS | 0 | 2 | 1 | 1 | 1 | 1 | 6  |
| FSHD 180 | 66 | M | 4-8 | A162PAS | 1 | 0 | 0 | 1 | 0 | 0 | 2  |
| FSHD 181 | 42 | M | 4-8 | A166PAS | 2 | 2 | 0 | 1 | 0 | 0 | 5  |
| FSHD 182 | 66 | M | 4-8 | A161PAS | 1 | 1 | 0 | 1 | 1 | 1 | 5  |
| FSHD 183 | 67 | F | 4-8 | A161PAS | 2 | 1 | 0 | 1 | 2 | 0 | 6  |
| FSHD 184 | 41 | M | 4-8 | A166PAS | 2 | 2 | 2 | 1 | 0 | 0 | 7  |
| FSHD 185 | 62 | M | 4-8 | A161PAS | 1 | 2 | 0 | 0 | 0 | 1 | 4  |
| FSHD 186 | 72 | F | 4-8 | A166PAS | 2 | 2 | 1 | 1 | 4 | 0 | 10 |

|          |    |   |      |         |   |   |   |   |   |   |           |
|----------|----|---|------|---------|---|---|---|---|---|---|-----------|
| FSHD 187 | 70 | F | 4-8  | A164PAS | 1 | 1 | 0 | 1 | 2 | 0 | <b>5</b>  |
| FSHD 188 | 43 | M | 4-8  | A161PAS | 1 | 2 | 1 | 0 | 0 | 0 | <b>4</b>  |
| FSHD 189 | 66 | M | 4-8  | A161PAS | 1 | 2 | 0 | 1 | 1 | 0 | <b>5</b>  |
| FSHD 190 | 48 | F | 4-8  | A161PAS | 1 | 2 | 1 | 1 | 2 | 1 | <b>8</b>  |
| FSHD 191 | 72 | F | 4-8  | A161PAS | 1 | 2 | 1 | 2 | 4 | 0 | <b>10</b> |
| FSHD 192 | 23 | M | 4-8  | A166PAS | 1 | 2 | 0 | 0 | 0 | 0 | <b>3</b>  |
| FSHD 193 | 24 | M | 4-8  | A161PAS | 1 | 2 | 1 | 0 | 0 | 0 | <b>4</b>  |
| FSHD 194 | 59 | M | 4-8  | A161PAS | 2 | 2 | 0 | 1 | 2 | 1 | <b>8</b>  |
| FSHD 195 | 73 | F | 4-8  | A161PAS | 1 | 0 | 0 | 1 | 2 | 0 | <b>4</b>  |
| FSHD 196 | 63 | F | 4-8  | A161PAS | 0 | 0 | 0 | 0 | 0 | 1 | <b>1</b>  |
| FSHD 197 | 57 | F | 4-8  | A161PAS | 1 | 0 | 1 | 1 | 0 | 0 | <b>3</b>  |
| FSHD 198 | 69 | M | 4-8  | A162PAS | 2 | 2 | 0 | 1 | 1 | 0 | <b>6</b>  |
| FSHD 199 | 60 | M | 4-8  | A161PAS | 1 | 3 | 1 | 1 | 2 | 0 | <b>8</b>  |
| FSHD 200 | 56 | F | 4-8  | A161PAS | 0 | 2 | 1 | 2 | 2 | 0 | <b>7</b>  |
| FSHD 201 | 55 | F | 4-8  | A161PAS | 1 | 2 | 1 | 2 | 4 | 1 | <b>11</b> |
| FSHD 202 | 74 | F | 4-8  | A161PAS | 1 | 1 | 0 | 0 | 2 | 0 | <b>4</b>  |
| FSHD 203 | 40 | M | 4-8  | A161PAS | 1 | 2 | 0 | 1 | 0 | 1 | <b>5</b>  |
| FSHD 204 | 25 | M | 4-8  | A161PAS | 1 | 2 | 0 | 0 | 0 | 0 | <b>3</b>  |
| FSHD 205 | 67 | F | 9-10 | A161PAS | 2 | 3 | 2 | 2 | 5 | 1 | <b>15</b> |

|          |    |   |      |         |   |   |   |   |   |   |    |
|----------|----|---|------|---------|---|---|---|---|---|---|----|
| FSHD 206 | 82 | F | 9-10 | A159PAS | 1 | 1 | 0 | 0 | 2 | 0 | 4  |
| FSHD 207 | 66 | F | 9-10 | A161PAS | 2 | 2 | 1 | 2 | 4 | 1 | 12 |
| FSHD 208 | 66 | M | 9-10 | A161PAS | 1 | 3 | 1 | 1 | 1 | 0 | 7  |
| FSHD 209 | 62 | M | 9-10 | A161PAS | 1 | 2 | 2 | 2 | 4 | 1 | 12 |
| FSHD 210 | 55 | F | 9-10 | A161PAS | 1 | 1 | 1 | 2 | 0 | 0 | 5  |
| FSHD 211 | 59 | F | 9-10 | A166PAS | 1 | 1 | 1 | 0 | 1 | 0 | 4  |
| FSHD 212 | 56 | F | 9-10 | A166PAS | 2 | 3 | 2 | 2 | 5 | 1 | 15 |
| FSHD 213 | 79 | F | 9-10 | A161PAS | 1 | 2 | 1 | 1 | 0 | 0 | 5  |
| FSHD 214 | 63 | M | 9-10 | A166PAS | 2 | 2 | 2 | 2 | 3 | 0 | 11 |
| FSHD 215 | 69 | M | 9-10 | A161PAS | 1 | 2 | 0 | 0 | 2 | 0 | 5  |
| FSHD 216 | 58 | M | 9-10 | A161PAS | 1 | 2 | 0 | 0 | 0 | 1 | 4  |
| FSHD 217 | 52 | M | 9-10 | A161PAS | 1 | 2 | 0 | 1 | 0 | 1 | 5  |
| FSHD 218 | 43 | M | 9-10 | A161PAS | 0 | 1 | 0 | 0 | 0 | 0 | 1  |
| FSHD 219 | 36 | F | 9-10 | A161PAS | 2 | 1 | 1 | 1 | 0 | 0 | 5  |
| FSHD 220 | 36 | M | 9-10 | A161PAS | 0 | 2 | 0 | 0 | 0 | 0 | 2  |
| FSHD 221 | 69 | F | 9-10 | A161PAS | 2 | 3 | 1 | 0 | 0 | 0 | 6  |
| FSHD 222 | 43 | F | 9-10 | A161PAS | 1 | 1 | 1 | 0 | 2 | 1 | 6  |
| FSHD 223 | 27 | M | 9-10 | A161PAS | 1 | 1 | 1 | 0 | 1 | 1 | 5  |
| FSHD 224 | 29 | M | >10  |         | 1 | 2 | 0 | 1 | 0 | 0 | 4  |

|          |    |   |     |   |   |   |   |   |   |           |
|----------|----|---|-----|---|---|---|---|---|---|-----------|
| FSHD 225 | 62 | F | >10 | 1 | 3 | 0 | 2 | 4 | 1 | <b>11</b> |
| FSHD 226 | 42 | M | >10 | 1 | 2 | 0 | 1 | 0 | 0 | <b>4</b>  |
| FSHD 227 | 45 | M | >10 | 1 | 0 | 0 | 1 | 0 | 1 | <b>3</b>  |
| FSHD 228 | 40 | M | >10 | 1 | 3 | 1 | 1 | 0 | 0 | <b>6</b>  |
| FSHD 229 | 71 | M | >10 | 1 | 2 | 0 | 1 | 2 | 0 | <b>6</b>  |
| FSHD 230 | 46 | F | >10 | 1 | 2 | 1 | 1 | 1 | 1 | <b>8</b>  |
| FSHD 231 | 56 | M | >10 | 2 | 3 | 2 | 2 | 5 | 0 | <b>14</b> |
| FSHD 232 | 70 | F | >10 | 1 | 2 | 1 | 2 | 2 | 0 | <b>8</b>  |
| FSHD 233 | 54 | F | >10 | 1 | 3 | 1 | 0 | 2 | 0 | <b>7</b>  |
| FSHD 234 | 33 | M | >10 | 1 | 2 | 0 | 0 | 0 | 1 | <b>2</b>  |
| FSHD 235 | 46 | M | >10 | 1 | 1 | 0 | 0 | 0 | 1 | <b>3</b>  |
| FSHD 236 | 30 | M | >10 | 1 | 3 | 0 | 1 | 1 | 1 | <b>7</b>  |
| FSHD 237 | 34 | M | >10 | 1 | 1 | 1 | 0 | 1 | 0 | <b>4</b>  |
| FSHD 238 | 45 | F | >10 | 1 | 3 | 0 | 1 | 3 | 0 | <b>8</b>  |
| FSHD 239 | 56 | F | >10 | 1 | 1 | 1 | 0 | 0 | 0 | <b>3</b>  |
| FSHD 240 | 63 | M | >10 | 1 | 2 | 0 | 1 | 2 | 1 | <b>7</b>  |
| FSHD 241 | 69 | M | >10 | 1 | 1 | 2 | 2 | 0 | 1 | <b>7</b>  |
| FSHD 242 | 55 | M | >10 | 0 | 0 | 1 | 2 | 2 | 0 | <b>5</b>  |
| FSHD 243 | 76 | M | >10 | 1 | 2 | 0 | 1 | 0 | 1 | <b>5</b>  |



|          |    |   |     |   |   |   |   |   |   |   |
|----------|----|---|-----|---|---|---|---|---|---|---|
| FSHD 244 | 44 | M | >10 | 2 | 1 | 0 | 0 | 0 | 0 | 3 |
| FSHD 245 | 81 | F | >10 | 2 | 2 | 1 | 0 | 2 | 1 | 8 |
| FSHD 246 | 34 | F | >10 | 2 | 1 | 1 | 0 | 0 | 1 | 5 |
| FSHD 247 | 33 | F | >10 | 1 | 2 | 0 | 1 | 0 | 0 | 4 |
| FSHD 248 | 31 | M | >10 | 2 | 2 | 0 | 0 | 0 | 1 | 5 |
| FSHD 249 | 50 | F | >10 | 1 | 1 | 0 | 0 | 1 | 1 | 4 |
| FSHD 250 | 43 | F | >10 | 1 | 0 | 0 | 1 | 0 | 1 | 3 |
| FSHD 251 | 45 | M | >10 | 2 | 1 | 0 | 1 | 0 | 0 | 4 |
| FSHD 252 | 49 | M | >10 | 1 | 3 | 1 | 0 | 2 | 0 | 7 |
| FSHD 253 | 60 | F | >10 | 1 | 2 | 1 | 2 | 1 | 0 | 7 |
